# 1 Understanding antimicrobial resistance 2 policies implementation in Vietnam: a 3 multilayer analysis of the veterinary drug 4 value chain

5  
6 Chloé Bâtie<sup>1\*</sup>, Nguyen Van Duy<sup>2</sup>, Nguyen Thi Minh Khue<sup>3</sup>, Marisa  
7 Peyre<sup>1</sup>, Marion Bordier<sup>1,4,5</sup>, Nguyen Thi Dien<sup>3</sup>, Vu Dinh Ton<sup>2</sup>,  
8 Flavie Goutard<sup>1,6,7,8</sup>

9  
10 1 ASTRE, CIRAD, INRAE, Univ. Montpellier, Montpellier, France,

11 2 Centre for Interdisciplinary Research on Rural Development, Vietnam National University of Agriculture, Hanoi, Vietnam,

12 3 Faculty of Social Sciences, Vietnam National University of Agriculture, Hanoi, Vietnam,

13 4 CIRAD, UMR ASTRE, Dakar, Senegal

14 5 Senegalese Agricultural Research Institute, Dakar, Senegal

15 6 CIRAD, UMR ASTRE, Hanoi, Vietnam,

16 7 National Institute of Animal Science, Hanoi, Vietnam,

17 8 National Institute of Veterinary Sciences, Hanoi, Vietnam

18  
19 \*Corresponding author

20 Correspondence: [chloe.batie@protonmail.com](mailto:chloe.batie@protonmail.com)

## 21 22 23 **ABSTRACT**

24 Reducing antibiotic use in livestock production has been a target for national action  
25 plans worldwide. The Vietnamese livestock plan issued in 2017 has, among other  
26 objectives, strengthened the regulatory framework for antibiotic use. While a  
27 progressive ban on prophylactic antibiotics in feed and the introduction of mandatory  
28 prescriptions have been introduced, the level of implementation of these measures  
29 remains unknown. This study explores the level of understanding, acceptance, and  
30 application of these regulations among veterinary drug value chain stakeholders. An  
31 iterative stakeholder mapping and analysis of the veterinary drug value chain was  
32 conducted in north and south Vietnam. We organized one focus group discussion in  
33 Hanoi with 12 participants and conducted 39 semi-structured interviews with  
34 governmental authorities, national research centers, foreign partners, and private  
35 stakeholders along the value chain. The discourses were analyzed to (1) map the  
36 veterinary drug value chain and interactions among stakeholders, (2) analyze  
37 stakeholder's technical and social capital regarding regulations, and (3) identify factors  
38 influencing their implementation. From the map of the veterinary drug value chain, we  
39 identified 30 categories of stakeholders. Based on the map, the capital, and the analysis  
40 of the discourse, we identified 10 factors that could influence their implementation.  
41 These factors included stakeholder perception of the new regulations, their level of  
42 knowledge, the availability of technical guidance, conflict of economic interest between  
43 stakeholders, scale-related management discrepancies, the technical and financial  
44 barriers to the implementation of the regulations at the local level, the presence of an

45 informal distribution channel, international influence, consumer demand for food  
46 safety, and the willingness to reduce the burden of antibiotic resistance. It was clearly  
47 identified that new regulations are a necessary step to reducing antibiotic usage in  
48 Vietnam, but that the lack of local stakeholder involvement combined with technical  
49 constraints were barriers to their implementation. The study underlined the need for  
50 greater involvement of local stakeholders in the development of regulations as well as  
51 the need to mainstream innovations developed by small producers.

52

53

54 **Keywords:** Antimicrobial usage; Livestock production; Stakeholder analysis; Regulations;  
55 Practice changes

56

## Introduction

58 A reduction in antibiotic use (ABU) in human, animal, and environmental sectors is  
59 urgently needed worldwide to prevent unnecessary deaths due to antibiotic resistance  
60 (ABR) (O'Neill, 2016). This is a complex issue that must be addressed from a One Health  
61 perspective (McEwen & Collignon, 2018). In this regard, the Tripartite Organization (World  
62 Health Organization, World Health Animal Organization, and Food and Agriculture  
63 Organization) has established a Global Action Plan calling on member states to take action  
64 (OMS, 2015). In this context, countries have developed and adopted their own National  
65 Action Plan (NAP) for the human and agricultural sectors. Vietnam was the first Southeast  
66 Asian country to adopt a national plan, followed by the Philippines in 2015 (Chua et al.,  
67 2021). It was approved in 2013, and followed in 2017 by the NAP for livestock and  
68 aquaculture (MARD, 2017). The main objective was to “tackle the human health risk related  
69 to ABR by better controlling the usage of antibiotics in livestock and aquaculture” (MARD,  
70 2017). A new NAP with similar objectives was adopted in 2021 (MARD, 2021) based on five  
71 priorities: raising awareness of ABR, promoting good farming practices and prudent ABU,  
72 monitoring ABU and ABR, strengthening international and cross-sectoral collaboration  
73 around ABR control, and lastly - the focus of our study - reviewing and enforcing  
74 regulations for the improved management of ABU.

75 Several actions were taken to achieve the latter objective. The Law on Veterinary  
76 Medicine (National Assembly, 2015) was amended with additional regulations to improve  
77 legislation governing ABU management. Antimicrobial growth promoters, which were  
78 widely used by Vietnamese farmers (Kim et al., 2013) and contribute to antibiotic  
79 resistance (McEwen & Collignon, 2018), were banned by the Animal Husbandry Law in  
80 2018 (National Assembly, 2018). The following decree (n°13/2020/ND-CP), was enacted to  
81 gradually cease the use of antibiotics (AB) in the feed for prophylaxis (Government of the  
82 Socialist Republic of Vietnam, 2020). A roadmap of implementation from 2020 to 2025 was  
83 issued, starting with high-priority critically important antibiotics, followed by the other AB  
84 on the WHO list of critical classes, and finally for all AB classes (WHO, 2019) with a  
85 complete ban planned for 2025. In 2020, a circular (n°122020TT-BNNPTNT) was issued to  
86 establish the prescription conditions for veterinary drugs, including antibiotics. The circular  
87 also included a roadmap of implementation (it will go into effect in 2020 for big-scale farms,  
88 2022 for medium-scale farms, 2023 for small-scale farms, and 2025 for household farms)  
89 (MARD, 2020).

90 These regulations also impact chicken production. The latter is a growing sector in  
91 Vietnam (J.D. Cesaro et al., 2019) due to its ease of production, low investment  
92 requirements, and high consumer demand. Three types of chicken production systems are  
93 commonly defined: integrated farms, family commercial farms, and household farms, with  
94 small-scale farms being the most common (GSOV, 2016; Bâtie et al., 2022). Interestingly,  
95 the different production systems were found to be strongly associated with the antibiotics  
96 and alternative feed additives value chain (Bâtie et al., 2022).

97 Regulations are one of the most common solutions developed to reduce antibiotic use.  
98 However, policy implementation is influenced by both internal and external factors  
99 (Brugha, 2000) and needs to be adapted to the local context to be effective. Other studies in  
100 Vietnam have previously described the antibiotic value chain and policy development  
101 organization (Brunton et al., 2019; Pham-Thanh, 2020). But interactions between  
102 stakeholders have not yet been explored within the context of new regulation  
103 implementation. However, these interactions can have an impact on implementation and

104 must be studied. A systems approach provides a comprehensive understanding and  
105 identifies which part of the system is likely to be impacted by the change. Furthermore,  
106 each stakeholder has unique reluctances and motivations for complying with new  
107 regulations, which must be investigated to identify levers for activation. Stakeholder  
108 mapping and analysis (SMA) is a methodology for understanding the implementation  
109 context of a policy to assess the feasibility of its application and enforcement (Zimmermann  
110 & Maennling, 2007; Bordier et al., 2018; Poupaud et al., 2021).

111 The purpose of this study is to understand how the regulations governing the  
112 progressive ban of AB in feed (decree n°13/2020/ND-CP) and on the mandatory  
113 prescriptions (circular n°122020TT-BNNPTNT) are understood, accepted, and applied by  
114 the different stakeholders in the antibiotics and alternative feed additives value chain. It  
115 also provides recommendations for improving their implementation while minimizing the  
116 impact on the most vulnerable members of the community.

117

118

## Material and methods

119 We conducted an iterative mapping analysis of stakeholders involved in the antibiotics  
120 and alternative feed additives value chain and concerned by regulations to reduce antibiotic  
121 use in livestock production in Vietnam. We focused on two new regulations that took effect  
122 in 2020: the progressive ban of antibiotics in feed (n°13/2020/ND-CP) and the mandatory  
123 prescription to buy drugs (n°122020TT-BNNPTNT). These regulations were chosen based  
124 on a preliminary study (Bâtie et al., 2022) due to their recent implementation and potential  
125 impact on the reduction of antibiotic usage in Vietnam.

126 The SMA was conducted in three steps (Zimmermann & Maennling, 2007; Bordier et al.,  
127 2018; Poupaud et al., 2021): (i) mapping of the antibiotics and alternative feed additives  
128 value chain to determine the structural position of the stakeholders within the chain; (ii)  
129 analyzing the technical and social capital of the identified stakeholders regarding the  
130 regulations to reduce antibiotic use; and (i) identifying the factors influencing the  
131 implementation of the new regulations.

132

### 133 Data collection

134 We first organized a focus group discussion (FGD) in December 2020 with 12  
135 stakeholders from the antibiotics and alternative feed additives value chain who were  
136 identified through semi-structured interviews in a preliminary study (Bâtie et al., 2022).  
137 The objectives were to collectively map the antibiotics and alternative feed additives value  
138 chain and identify key stakeholders. The discussion was organized around three topics: (i)  
139 identifying the stakeholders in the chain and their roles, (ii) drawing the chain and their  
140 interactions, and (iii) identifying existing antibiotic-related legislation [Supplementary  
141 Material 1]. Four researchers from the Vietnam National University of Agriculture (VNUA)  
142 led the three-hour in-person focus group in Vietnamese, using participatory epidemiology  
143 tools such as flowchart building (Catley et al., 2012). The first author was present remotely  
144 and received simultaneous Vietnamese-English translation from a team member. The FGD  
145 was recorded, the minutes were transcribed and translated into English, and the value  
146 chain drawn by the participant was translated and copied into a Word document.

147 From March to October 2021, we conducted semi-structured interviews in northern and  
148 southern Vietnam with representatives of the categories of stakeholders identified during

149 the FGD. The interview guide was divided into four main topics: (i) position and role within  
150 the antibiotics and alternative feed additives value chain, (ii) interactions with other  
151 stakeholders and the nature of those interactions, (iii) knowledge and opinions on  
152 antibiotic resistance in Vietnam and about the NAP, and (iv) barriers and motivations for  
153 implementing the two new regulations under consideration and their expected impacts on  
154 the chain [Supplementary Material 2]. Because of the COVID-19 health crisis, five interviews  
155 were conducted in person, with the remainder conducted online. A map of the veterinary  
156 drug value chain map was shared with all participants. The first version of the map  
157 presented was built from the results of the FGD and then modified as the interviews  
158 progressed. Participants were asked to identify themselves on the map and to describe the  
159 nature of their interactions with the other stakeholders. They were able to propose changes  
160 to the map. The interviews were audio-recorded and lasted between 60 to 90 minutes. The  
161 first author conducted them in English or French, with the research assistant translating  
162 into Vietnamese when necessary. Throughout the interviews, notes were taken. They were  
163 then transcribed and translated into English, as needed.

164 Before starting the FGD and interviews, the objectives of the study were explained to the  
165 participants, and they gave their informed consent to participate in the study. Ethical  
166 approval was granted from the Ethics Review Board for biomedical research at Hanoi  
167 University of Public Health with the application number 020-419/DD-YTCC.

168

#### 169 Data analysis

170 The maps created during the FGD, and semi-structured interviews were compiled and  
171 reproduced using a flowchart maker and online diagram software (diagrams.net). The  
172 semi-structured interviews were analyzed by thematic analysis following the steps  
173 described by Castleberry and Nolen (Castleberry & Nolen, 2018) and coded using the  
174 qualitative software package NVivo (V.12,2, QSR International). Thematic analysis is an  
175 inductive approach to identifying and analyzing patterns within the transcripts. Codes are  
176 descriptive labels attached to similar words or sentences in raw data. They are then  
177 reassembled into themes, allowing us to get a bigger picture of the data regarding the  
178 research question. Themes were defined *a priori* based on the guide of the interviews.  
179 Themes were refined and new ones emerged through a process involving both forward and  
180 backward methods. The first author conducted the coding, and the team validated the code  
181 matrix.

182 The thematic analysis allowed us to first confirm and improve the map of the antibiotics  
183 and alternative feed additives value chain, identify the structural position of the  
184 stakeholders, and define their role within this chain. Secondly, each stakeholder who was  
185 interviewed was analyzed based on three themes related to their technical and social  
186 capital in relation to regulation: legitimacy (institutional position, involvement in the law  
187 design, formal or informal flow of antibiotics), resources (knowledge and technical  
188 capacities to implement the regulations), and connections (number and quality of  
189 relationship) to other stakeholders in the chain (Figure 1) (Zimmermann & Maennling,  
190 2007; Poupaud et al., 2021). We were able to categorize each actor according to their  
191 capital level by assigning a score ranging from absent (-) to strong (+++). Each category of  
192 stakeholders was assigned the average score of participants within that category. Third, we  
193 identified the factors influencing the implementation of the new regulations using the chain  
194 map, stakeholder classification, and semi-structured interview coding (barriers, and levers

195 to implement the new regulations). Data were triangulated (de Sardan, 2008) through  
196 multiple sources of information (different respondents, flow chart), observation when  
197 possible, and team discussion.

198

199

200

## Results

201

### Description of focus group and semi-structured interviews participants

202

203

204

205

206

207

208

209

210

211

In December 2020, twelve respondents participated in a focus group discussion in Hanoi. Four participants were from the public sector (three from the Sub-Department of Animal Health and Livestock Production (Sub-DAHLP) and one from the veterinary district station), while eight were from the private sector. From March to October 2021, 39 interviews were conducted with participants from four provinces (Hanoi, Hung Yen, Hai Phuong, and Bac Ninh) in north Vietnam and three provinces (Hô Chi Minh, Long An, and Dong Thap) in south Vietnam. Participants included government officials (n = 12), private sector workers (n = 18), and foreign partner institutions (n = 4). Table 1 describes the participants.

212  
213

214 **Table 1:** Socio-demographic characteristics of the respondents of the semi-structured  
215 interviews (n=39), 2021, Vietnam.

| Characteristics          | Number (n=39) | Characteristics                    | Number (n=39) |
|--------------------------|---------------|------------------------------------|---------------|
| <i>Gender</i>            |               | <i>Category of stakeholders</i>    |               |
| Male                     | 27            | DAH                                | 1             |
| Female                   | 12            | DLP                                | 2             |
| <i>Location</i>          |               | Sub-DAHLP                          | 5             |
| North                    | 28            | DARD                               | 1             |
| South                    | 11            | Veterinary district station        | 1             |
| <i>Sector</i>            |               | Communal veterinarian              | 2             |
| Public sector            | 13            | National research center           | 1             |
| Private sector           | 22            | Feed company                       | 3             |
| International partner    | 4             | Alternative feed additives company | 3             |
| <i>Territorial level</i> |               | Technician                         | 1             |
| Supra-national           | 8             | Importer/Producer                  | 3             |
| National                 | 10            | Distributor                        | 2             |
| Provincial               | 10            | Agencies level 1 and 2             | 5             |
| District/communal        | 11            | Veterinarian                       | 1             |
|                          |               | Integrated farm                    | 1             |
|                          |               | Family commercial farm             | 2             |
|                          |               | Household farm                     | 1             |
|                          |               | International organization         | 1             |
|                          |               | Foreign research center            | 2             |
|                          |               | Foreign development agencies       | 1             |

216  
217  
218  
219  
220

MARD: Ministry of Agriculture and Rural Development; DAH: Department of Animal Health; DLP: Department of Livestock Production; Sub-DAHLP: Sub-Department of Animal Health and Livestock Production; DARD: Department of Agriculture and Rural Development, agencies level 1 and 2: local drugstores.

221  
222

## 223 Structural position of the stakeholders within the veterinary drug value chain

224 The veterinary drug value chain, as mapped during the FGD, was revised three times  
225 during semi-structured interviews. Figure 1 shows the result. There was no difference in  
226 chain structure between respondents from North and South Vietnam. Finished products are  
227 imported or made in Vietnam using imported components. They are then distributed either  
228 directly to farmers or through agencies. An agency was defined by the participants as a shop

229 selling drugs, agricultural equipment, or animal feed and owned by a veterinarian. Agencies  
230 1 and 2 differ in size, source of supply (level-1 agencies are directly connected to drug  
231 companies, whereas supply-level-2 agencies target consumers). A third level was  
232 occasionally reported by participants, but as it differed between interviews, it was not  
233 included in the figure. The end users were identified as three types of farms with different  
234 input and output sources: integrated farms (contracts with integrators), family commercial  
235 farms (private farms), and household farms (backyard farms). VietGAHP (Vietnamese Good  
236 Animal Husbandry Practices) farms were certified under the same-named standards. We  
237 defined veterinarians as veterinarians who worked for an agency or independently that  
238 provided farmers with direct advice and drugs. Technicians were veterinarians employed  
239 by a company. Their roles are described in Supplementary Material 3.

240 Interactions among the identified stakeholders varied. The agencies charge a fee for  
241 drugs, feed, and materials, but they also offer farmers free advice. These interactions can be  
242 facilitated through a contract between farmers, agencies, and distributors. In this case, they  
243 receive preferential pricing and benefits if they purchase or sell a certain number of drugs.  
244 The interactions can also take place across a network of farms, in which a technician  
245 employed by an integrator provides the farm with drugs and advice.

246 This chain is regulated by authorities at various territorial levels, as shown in Figure 2.  
247 The Department of Animal Health (DAH) regulates antibiotic importation, production, and  
248 distribution, as well as medicated feed mills. The department is also responsible for  
249 delivering practice certificates to veterinarians. The Department of Livestock Production  
250 (DLP) regulates feed companies. The DAH oversees the provincial Sub-Department of  
251 Animal Health (Sub-DAH), which merged with the Sub-Department of Livestock Production  
252 (Sub-DLP) to form the Sub-Department of Animal Health and Livestock Production (Sub-  
253 DAHLP). They provide them with information and guidelines for implementing legislation.  
254 In exchange, they receive reports on the situation in each province. The two last  
255 administrative levels are a veterinary district station and a communal veterinarian, which  
256 operate on the district and communal levels, respectively. Finally, international  
257 organizations, international collaborators, and national and foreign research centers work  
258 together with government authorities to provide evidence for the development of new  
259 policies and technical guidance.  
260



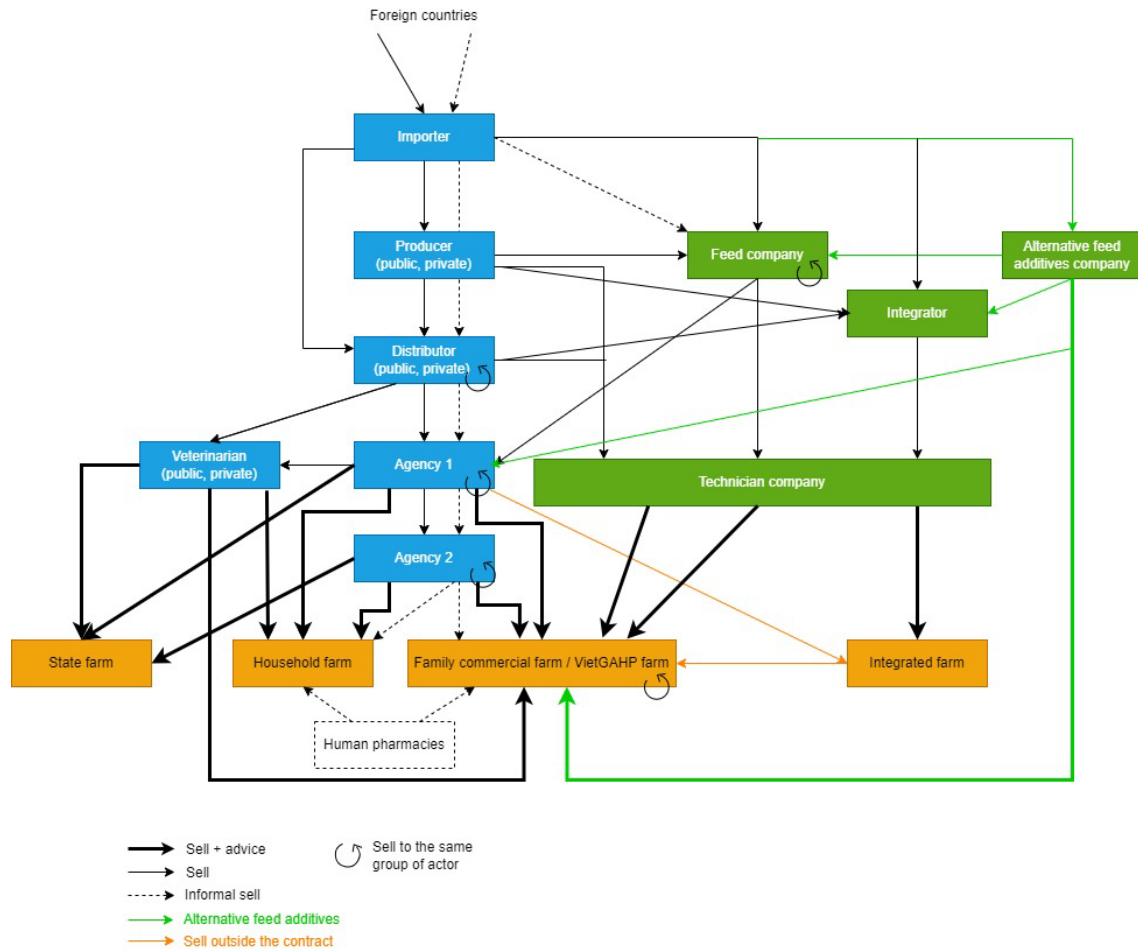

261  
262

263 **Figure 1:** Organization of the antibiotics and alternative feed additives value chain from focus group  
264 discussion (n=12) and semi-structured interviews (n=39), 2020-2021, Vietnam.

265 In bold: sell and give advice; VietGAHP: Vietnamese Good Animal Husbandry  
266 Practices.

267  
268

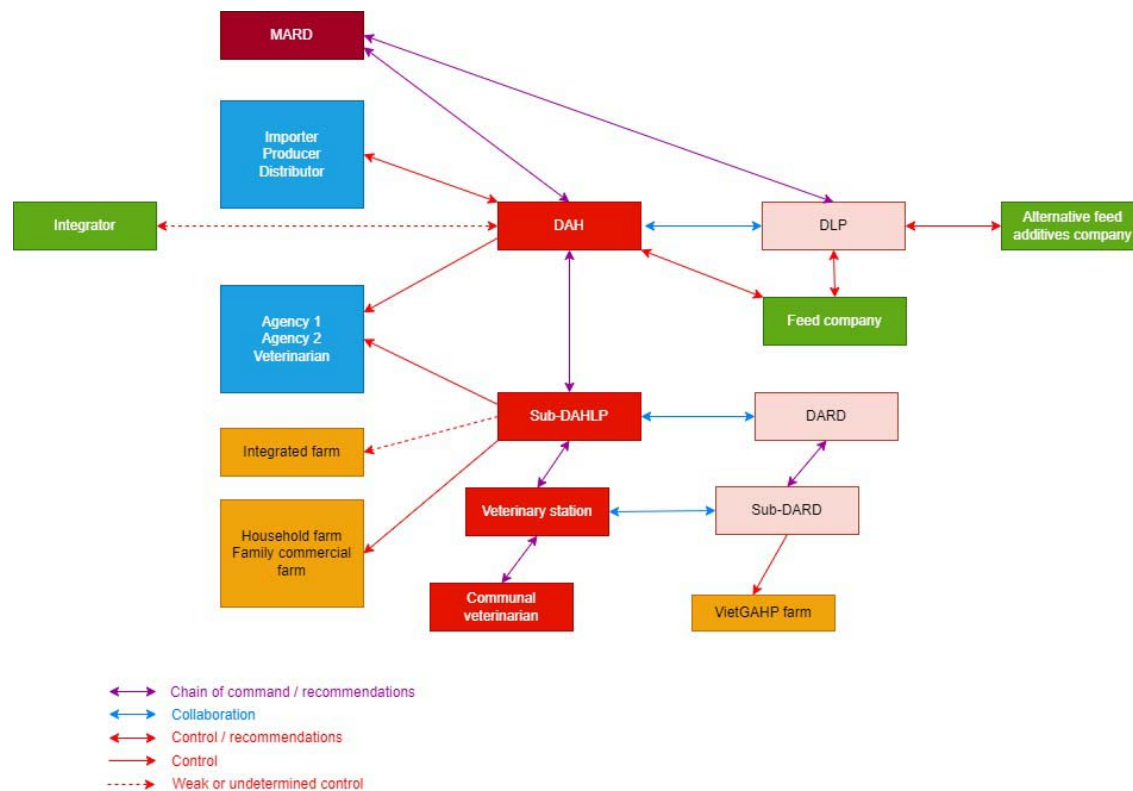

269

270 **Figure 2:** Chain of control of the antibiotics and alternative feed additives value chain and chain of  
 271 command between governmental authorities from focus group discussion (n=12) and semi-structured  
 272 interviews (n=39), 2021, Vietnam.

273 MARD: Ministry of Agriculture and Rural Development; DAH: Department of Animal  
 274 Health; DLP: Department of Livestock Production; Sub-DAHLP: Subdepartment of  
 275 Animal Health and Livestock Production; DARD: Department of Agriculture and Rural  
 276 Development.

277

278

279 Technical and social capital in stakeholders regarding regulations

280 Through the FGD and individual interviews, we identified 30 categories of stakeholders  
 281 affected by the regulations. They were divided into three groups: the public sector  
 282 comprising governmental bodies and national research centers (n=9), the private sector  
 283 involving stakeholders from importation to final antibiotic users (n=15), and international  
 284 partners (n=6) (Figure 3). Analyzing the main functions of the potential key stakeholders  
 285 helped us identify those who have significant influence. The stakeholders' technical and  
 286 social capital based on their legitimacy, resources, and connections is outlined in Table 2  
 287 and visualized in Figure 4. More information can be found in Supplementary Material 3.

288

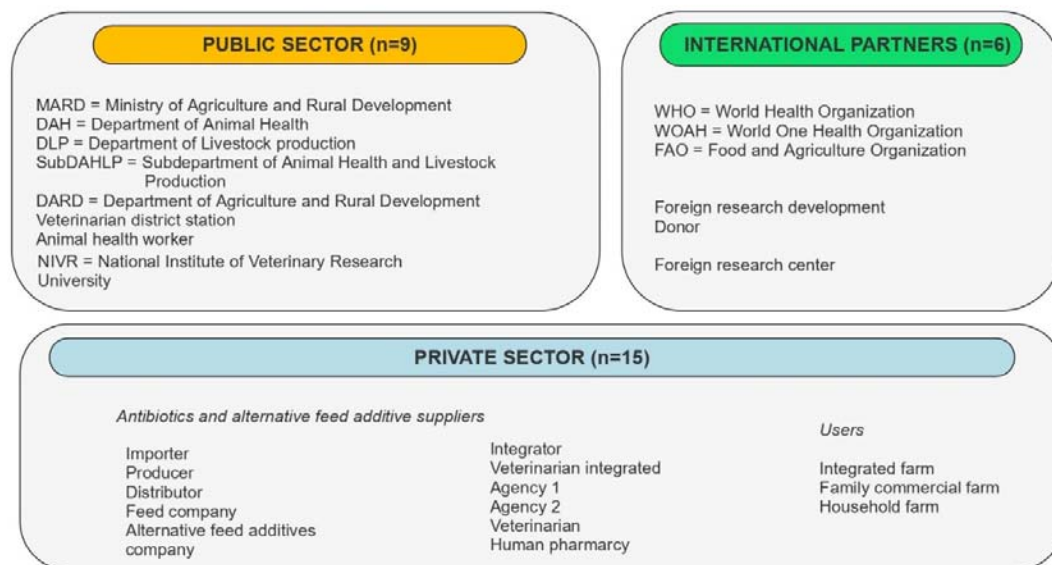

289

290 Figure 3: Categories of key stakeholders (n=30) involved in the antibiotics and alternative feed additives  
291 value chain from focus group discussion (n=12) and semi-structured interviews (n=39), 2020-2021,  
292 Vietnam.

293 Actors belonged to public sector (orange), international partners (green), and private  
294 sector (blue).

295

296  
297  
298  
299

**Table 2:** Classification of the stakeholders of the veterinary drug value chain interviewed according to their level of legitimacy, resources, connections regarding new regulations on the progressive ban of AB in the feed (n°13/2020/ND-CP) and mandatory prescription (n°122020TT-BNNPTNT), 2021, Vietnam.

| Stakeholders                                                         | Legitimacy | Resources | Connections |
|----------------------------------------------------------------------|------------|-----------|-------------|
| <b>Public sector</b>                                                 |            |           |             |
| <i>Governmental authorities</i>                                      |            |           |             |
| Ministry of Agriculture and Rural Development (MARD)                 | NA         | NA        | NA          |
| Department of Animal Health (DAH)                                    | +++        | ++        | ++          |
| Department of Livestock Production (DLP)                             | +++        | ++        | ++          |
| Sub-department of Animal Health and Livestock Production (Sub-DAHLP) | +++        | +         | +++         |
| Provincial Department of Agriculture and Rural Development (DARD)    | ++         | +         | ++          |
| Veterinary district station                                          | +          | -         | +           |
| Communal veterinarian                                                | +          | -         | +           |
| <i>National Research Centers</i>                                     |            |           |             |
| National research center                                             | +++        | ++        | ++          |
| University                                                           | NA         | NA        | NA          |
| <b>Private sector</b>                                                |            |           |             |
| <i>National private stakeholders</i>                                 |            |           |             |
| Feed company                                                         | ++         | ++        | ++          |
| Alternative feed additives company                                   | +          | ++        | +           |
| Importer                                                             | ++         | ++        | ++          |
| Producer                                                             | ++         | ++        | ++          |
| Distributor                                                          | ++         | +         | ++          |
| Technician                                                           | +          | ++        | ++          |
| <i>Local private stakeholders</i>                                    |            |           |             |
| Agency level 1                                                       | +          | +         | ++          |
| Agency level 2                                                       | +          | +         | +           |
| Veterinarian                                                         | +          | +         | +           |
| <i>Informal value chain</i>                                          |            |           |             |
| Informal drug seller                                                 | NA         | NA        | NA          |
| Human pharmacy                                                       | NA         | NA        | NA          |
| <i>Users</i>                                                         |            |           |             |
| Integrator                                                           | NA         | NA        | NA          |
| Integrated farm                                                      | +          | ++        | ++          |
| Family commercial farm                                               | +          | +         | ++          |
| Household farm                                                       | +          | +         | +           |
| VietGAHP farm                                                        | NA         | NA        | NA          |
| State farm                                                           | NA         | NA        | NA          |
| <b>International partners</b>                                        |            |           |             |
| World Health Organisation (WHO)                                      | NA         | NA        | NA          |
| Food and Agriculture Organisation (FAO)                              | ++         | +++       | ++          |
| World Animal Health Organisation (WAHO)                              | NA         | NA        | NA          |
| Foreign research center                                              | ++         | ++        | ++          |
| Foreign development agencies                                         | ++         | +++       | +           |
| Donor                                                                | NA         | NA        | NA          |

300  
301  
302  
303  
304  
305  
306  
307  
308  
309

**Legitimacy:** Defined by the institutional position (acquired by law or perceived by the public to be legitimate) of the stakeholders and their involvement in the law design and/or by the type of antibiotics flow formal (flow monitored by the government) or informal. **Resources:** Defined by stakeholders' knowledge of ABU, ABR, and regulations, and by the technical (financial, human, material) resources to apply the new regulations. **Connections:** Number of interactions within the veterinary drug value chain and quality of stakeholder's relationships (level of trust, frequency of connection, formal or informal). +++ strong, ++ medium, + weak, - absent, ? indetermined. NA: not assessed. Definitions adapted from Zimmermann, 2007; Poupaud et al., 2021; Bordier et al., 2018.

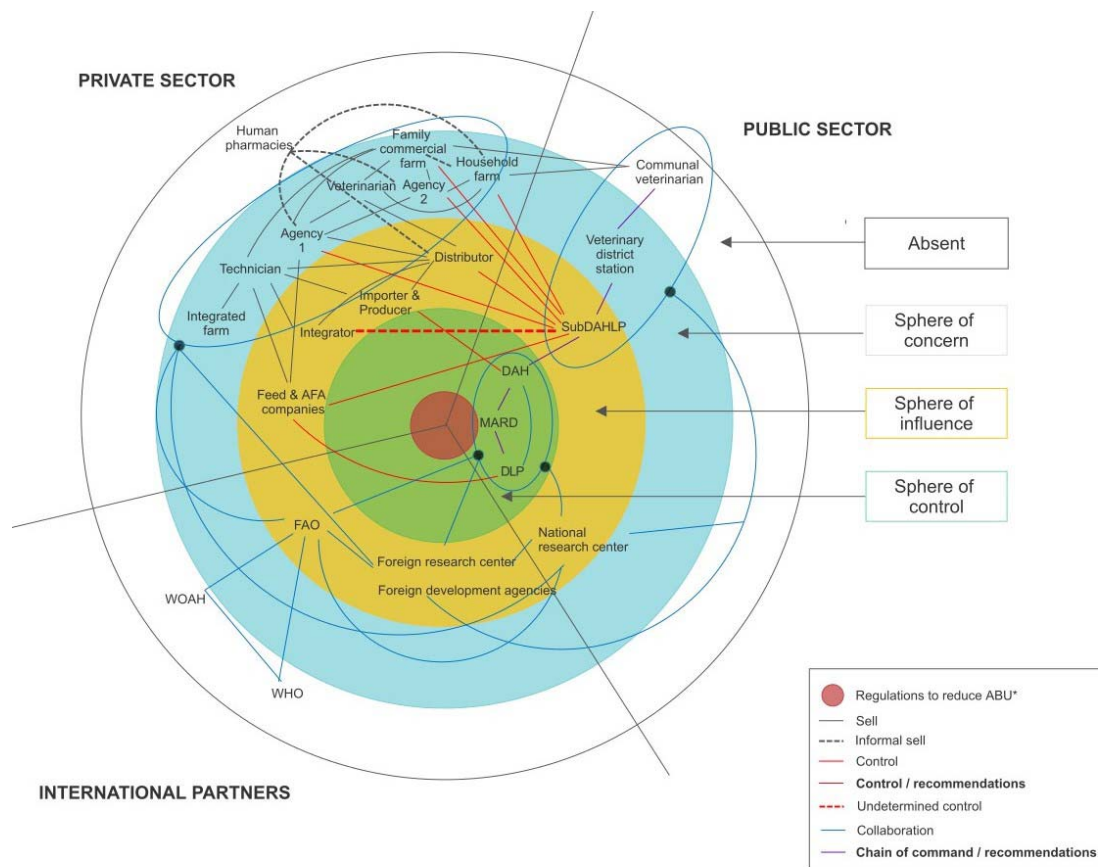

310

311 **Figure 4:** Onion ring visualization of the technical and social capital of the identified stakeholders within  
 312 the chain regarding regulations to reduce antibiotic use from semi-structured interviews (n=39), 2021,  
 313 Vietnam.

314 \*: focus on new regulations on the progressive ban of AB in the feed (n°13/2020/ND-  
 315 CP) and mandatory prescription (n°122020TT-BNNPTNT). Sphere of control:  
 316 stakeholders who are central to behaviors and activities. Sphere of influence:  
 317 stakeholders who have the power to change the outcome on impacts. Sphere of  
 318 concern: stakeholders who have no control over the actions of others but who are  
 319 affected by the regulations. Absent: stakeholders who have no control over  
 320 regulations. Onion ring visualization adapted from (Zimmermann & Maennling, 2007;  
 321 Bordier et al., 2018).

322

323 *Public sector*

324 The public sector included government authorities and national research centers.

325

326 **Government authorities**

327 Their legitimacy, resources, and connections decreased throughout the value chain.  
 328 Respondents indicated that the central level was critical in the development of the NAP and  
 329 regulations (Figure 4). The DAH was described as an "umbrella" that manages all activities  
 330 related to the veterinary drug value chain, and in the NAP, they are identified as the focal  
 331 point for implementation. The central government (DAH and DLP) had a good

332 understanding of ABR, ABU, and regulations, though they acknowledged that they were not  
333 always aware of the full ABR situation in Vietnam.

334

335 "I don't know exactly what the current situation is, many projects are working on  
336 antimicrobial resistance. (...) actually, I don't believe we have a full picture for the  
337 country." (Interview 12 (IW12), government authority)

338

339 The DAH and DLP also collaborated to develop the circular on mandatory prescriptions  
340 (circular 12). They are linked to a number of stakeholders (MARD, international partners,  
341 Sub-DAHLP, national private stakeholders), but not directly to small holders and drug  
342 sellers locally. The central government's legitimacy, resources, and connections provided it  
343 influence over the legislative process and the formulation of new regulations.

344 The Sub-DAHLP was viewed as a link between central, district, and communal  
345 authorities. Their missions included monitoring everything related to antibiotic use,  
346 including drug agency control (certificate of practice, banned substances, and quality  
347 testing). However, participants suggested that their mission had limitations.

348

349 The Sub-DAHLP could also offer suggestions for the development of new regulations.  
350 Other stakeholders rated their knowledge as average, and in some provinces, they were  
351 perceived to lack the human and technical capacity needed to enforce new regulations.  
352 Indeed, differences between provinces were observed in the five interviews conducted with  
353 Sub-DAHLP representatives, not only in terms of ABR and regulation knowledge, but also in  
354 technical capacity to enforce the regulations. The Sub-DAHLP was described as having a  
355 close relationship with all stakeholders in the veterinary drug value chain, particularly with  
356 drug agencies. Sub-DAHLP employees are responsible for controlling agencies, but they also  
357 frequently own them as a secondary source of income. A respondent raised the possibility  
358 of a conflict of interest between the competent authority and the private sector in terms of  
359 ABU management. The Sub-DAHLP also plays an important role in ABU and ABR research.  
360 They not only authorize data collection, but they also connect research projects, farms, and  
361 drugstores.

362

363 "What also surprised me is the link between the Sub-DAH vet and the drugshops. A  
364 lot of them, at least 30/50%, are owned by staff affiliated with Sub-DAH or former  
365 Sub-DAH staff." (IW 28, international partner)

366

367 District veterinarians at the veterinary district station were not perceived to play a  
368 significant role in Vietnam's antibiotic reduction regulations. Other stakeholders perceived  
369 them to have limited knowledge of ABU and ABR, as well as limited capacity to implement  
370 regulations. They were also described as relaying information about new regulations to  
371 farmers and drug sellers.

372 Communal veterinarians were perceived to have no role in regulatory development or  
373 implementation; their primary function was to organize mandatory vaccination. The  
374 majority of our communal veterinarian interviewees were not qualified veterinarians and  
375 had limited knowledge, learning from the experiences of drugstore agents and farmers.  
376 They admitted to not being very involved in the fight against ABR. Their primary source of  
377 income was treating diseases in farmers' livestock and selling antibiotics; the second came  
378 from government subsidies. They directly connected with farmers in the local area.

379

380 **National research centers**

381 National research centers were considered as knowledgeable about the ABU and ABR  
382 situation in Vietnam. A foreign research center perceived them as getting more involved in  
383 the fight against ABR. By leading research on ABU, ABR, and AB residues, they were  
384 providing evidence that authorities used to create regulations. They were directly overseen  
385 by the MARD, either DAH or DLP. They also had strong ties to international organizations  
386 and foreign research institutions. They said that they had frequent contact with farmers and  
387 drug sellers while conducting research. They were not, however, directly connected to  
388 MARD; rather, their findings were reported to MARD by international organizations.

389 *Private sector*

390 The private sector included stakeholders operating on a national and local scale, as well  
391 as users.

392 **Private national stakeholders**

393 This category included drug, feed, and alternative feed additive companies and  
394 integrators.

395 They were perceived by authorities and other private stakeholders as having the  
396 necessary knowledge, technical capabilities, and human resources to implement the  
397 regulations. These companies employ technicians who provide free technical advice to  
398 large-scale farmers on a contract basis. Their technicians studied veterinary medicine at the  
399 university level, so they are authorized to write prescriptions, giving them an advantage in  
400 enforcing the regulations. The most influential were involved in the regulation design, while  
401 others were aware of regulatory changes before local stakeholders. Before the regulations  
402 were issued, some drug companies began producing alternative medicines, and feed  
403 companies replaced antibiotics with supplemented feed. Alternative feed additive  
404 companies provided large-scale farms with free guidance as a trial. However, they reported  
405 insufficient resources to deal directly with smallholders, and their products' packaging was  
406 not always appropriate for them.

407 They had a strong connection that was formalized through a contract with integrated  
408 farms, large family commercial farms, and level 1 agencies. They had no direct contact with  
409 households or small and medium-sized family commercial farms.

410

411 **Private local stakeholders**

412 This category included level 1 and 2 agencies and veterinarians who did not have a shop.  
413 They were perceived as having weak legitimacy because they were not part of the decision-  
414 making process when designing regulations and also because they sometimes sell banned  
415 antibiotics.

416

417 "Most of the vet drug shops in Vietnam sell banned drugs. That's the reality." (IW22,  
418 agency level 1)

419

420 They were also seen as lacking the resources to implement new regulations. Level 1  
421 agency representatives usually had a veterinary degree and an in-depth knowledge of ABU  
422 and ABR, but not all level 2 agencies were run by veterinarians, and not all employees were  
423 trained in animal diseases and antibiotic use. Other stakeholders described them as being  
424 underinformed, and during the interviews, they were not always aware of the new  
425 regulations. They were, however, perceived to play an important role in the implementation  
426 of regulations due to their close connection with farmers.

427

## 428 **Users**

429 The users included integrated farmers, family commercial farmers, and household  
430 farmers. Users are defined as having a low level of legitimacy because they were not  
431 involved in the law-making process (with the exception of the most important integrated  
432 farms), despite being perceived as directly affected by regulatory changes.

433 According to many respondents, farmers lacked knowledge of regulations and prudent  
434 ABU practices. Small-scale farms were frequently cited as the source of AB misuse in  
435 Vietnam.

436 They had strong connections among them, sharing their experiences. The strength of  
437 their connection with agencies differed between users. Some of them went to various  
438 agencies without seeking advice, purchasing drugs solely based on their own experience.  
439 Others, however, relied heavily on advice from trusted agencies. Integrated farms and large  
440 family commercial farms were connected to drug and feed agencies or integrators by a  
441 contract.

## 442 *International partners*

443 International partners included international organizations, foreign research centers,  
444 and foreign development agencies. International partners provided evidence of the ABU  
445 and ABR situation in Vietnam and were thus considered legitimate. They self-assessed their  
446 influence as moderate, noting that they were not the final decision-makers and could only  
447 make recommendations to policymakers. However, the DAH relies on research project  
448 findings to develop new regulations, and the majority of them were involved in the  
449 development of the NAP alongside national authorities.

450

451 “I think we have an influence because I have seen a lot of my papers cited even in the  
452 legislation (...) However, you don't know how much influence there is” (IW28,  
453 international partner)

454

455 International partners were perceived to have a thorough understanding of ABU and  
456 ABR in Vietnam. They had the ability to organize workshops, conduct research, create  
457 guidelines, and assist the government. Respondents also identified donors as having greater  
458 influence because they bring fundings and thus can set the direction of the governmental  
459 action.

460 International partners were described as being indirectly linked to the value chain.  
461 Collaboration between different research centers, foreign development agencies, and  
462 international organizations was perceived to be multifaceted. Their connections with  
463 companies or integrators appeared limited, as conducting research with integrated farms  
464 could be difficult. They did, however, collaborate with other companies to conduct product  
465 trials.

466

## 467 Factors influencing the implementation of new regulations

468 Based on our analysis of the stakeholders' capital regarding regulations, we identified 10  
469 factors that influenced, positively or negatively or both, the implementation of new  
470 regulations [Supplementary Material 4].



471 *Stakeholders' perceptions of the new regulations*

472 The vast majority of value chain stakeholders were positive about the new regulations.  
473 They recognized their importance in reducing antibiotic use and, as a result, fighting  
474 antibiotic resistance and protecting human health. Respondents thought that farmers will  
475 be forced to change their practices over time, and that new regulations are an important  
476 step toward that goal. Except for government stakeholders, they all stated that they would  
477 be difficult to implement and lacked confidence in their short-term implementation.  
478 Respondents also compared the situation in the human sector, where prescriptions are  
479 required to purchase drugs, but this regulation isn't enforced.

480

481 "Without a doctor's prescription, you can still buy medicine for self-treatment."  
482 (IW39, household farm)

483

484 "This law is a feasible way to reduce antimicrobial use but it will take 5-10 years for  
485 farmers to adapt to it. The government expects it to be achieved in 1-2 years, but  
486 that's impossible, it will take a long time to raise farmers' awareness." (IW24, local  
487 veterinary service)

488 *Level of knowledge*

489 Gaps of knowledge about ABU, ABR, and on regulations were perceived as barriers to  
490 their implementation.

491 Others believed that the majority of respondents lacked sufficient knowledge about ABU  
492 and ABR. As a result, respondents reported that the ABR increase was due by overuse of  
493 antibiotics, incorrect dosage and duration, and the use of banned antibiotics. The  
494 emergence of resistance on farms has led farmers to increase dosage and switch of  
495 antibiotics, leading to untreatable conditions, higher farm expenditure, and the need to find  
496 alternative solutions. Only a few respondents identified the impact on human health as a  
497 long-term consequence, and most farmers perceived ABR as invisible with only long-term  
498 effects.

499

500 "It's true that the officers don't really understand what antimicrobial resistance is,  
501 not to mention farmers. Especially, they believe what they see, but the effect of AMR  
502 has long-term consequence that are not immediately visible." (IW25, local  
503 veterinary service)

504

505 In terms of regulations, stakeholders, with the exception of central government actors,  
506 had a limited understanding of the decree on antibiotic usage in feed, but awareness of the  
507 circular on prescription was limited and confused with a previous law (Law on Veterinary  
508 Medicine, 2015). Farmers and local drug sellers were the least aware of regulations,  
509 followed by communal and district veterinarians and sometimes Sub-DAHLP. National  
510 companies, the national government, and researchers were all aware of the regulatory  
511 changes. Respondents' understanding of mandatory prescription regulations was low,  
512 especially for farmers who did not understand the benefit of this regulation. Mass media,  
513 the internet, and loudspeakers were the principal sources of information for drug sellers  
514 and farmers, but they recognized the need to increase communication around new laws.  
515 Some workshops were also organized by companies together with the government.

516

517 *Technical guidance availability on the implementation of regulations*

518 At the central and international levels (private, public, and foreign partners), the  
519 respondents were all aware of the regulations but unsure of how to implement them in  
520 practice. Not technical guidance was provided, and it was not clear how regulations should  
521 be enforced. Moreover, regulations were also perceived as incomplete, especially because  
522 details regarding on-farm inspections were not included (number of inspections per year,  
523 exact procedure). They consider this is significant because, even if buying feed containing  
524 antibiotics for chickens older than 21 days was banned, farmers continued to add  
525 antibiotics to the feed. For some respondents, stricter sanctions should also be included in  
526 the regulations to oblige farmers and producers to comply with them.

527 The lack of technical guidance and economic interest for farmers was also identified as a  
528 barrier to their implementation.

529

530 “If the law is not thorough, difficult to implement, and does not bring economic  
531 benefits, it is not mandatory for me to follow it.” (IW36, integrated farmer)

532 *Conflict of economic interest between stakeholders*

533 Those who didn't comply with the regulations were perceived to have an economic  
534 advantage over the others, which encouraged non-compliance with regulations. For  
535 farmers, using antibiotics for prevention was a way to reduce disease incidence and ensure  
536 good production, while buying antibiotics over the counter was a way to save time in case of  
537 flock disease. For drug sellers, selling AB without a prescription is faster than with one,  
538 allowing them to sell more drugs and thus increase their income.

539

540 “This law cannot be applied in practice when chickens are sick; I buy medicine  
541 myself rather than waiting for a veterinarian prescription.” (IW37, family  
542 commercial farmer)

543

544 Feed companies that add antibiotics to feed benefit more than others. Indeed, if feed is  
545 perceived as less efficient because of the absence of antibiotics, farmers will switch to a feed  
546 supplier known to add antibiotics to feed to maximize their production. Respondents  
547 reinforce the fact that, for regulations to be effective, they must be applied by everyone at  
548 the same time.

549

550 “Enforcement is one of the issues because of the violation of certain (...). If one of  
551 them uses it illegally, that means that somehow, they have the benefit of market  
552 competitiveness.” (IW34, international partner)

553 *Scale-related management discrepancies*

554 The predominance of small-scale farms in Vietnam was perceived by respondents as a  
555 major barrier. They had poor farming management practices, which were accentuated by  
556 intermittent production. Indeed, some farmers produced a few hundred chickens for the  
557 Lunar New Year and then stopped their production after selling the batch. Farmers treated  
558 their chickens themselves or according to the experience of other farmers and bought drugs  
559 without a prescription based on their own experience. They also did not always consider  
560 the advice of veterinarians. Small-scale farmers aged between 50 and 60 showed less  
561 willingness to change compared to the younger generation.

562 There was insufficient control over small-scale farms because the government did not  
563 have the human and financial capacity to inspect them all.

564

565 “Even if we don’t put antibiotics in feed, they can still buy drugs from drug agencies  
566 and add it themselves.” (IW29, feed company)

567

568 Additionally, some drug sellers sold AB without the proper qualifications. This is made  
569 possible by the limited control capacity of Sub-DAHLP to inspect all small retailers.

570 Integrated and large-scale farms were perceived to be more compliant with legislation.  
571 Firstly, they were more aware of regulatory changes and had time to adapt due to their  
572 direct link with integrators. Integrators, drug, and feed companies were also better  
573 prepared for regulatory change because in-company veterinarians were qualified to write  
574 out prescriptions under the new regulation. Also, respondents explained that it was more  
575 difficult for a large farm to add antibiotics to feed and to mix them themselves than for  
576 small scale farms. Government or contract farm integrators carried out more on-farm  
577 inspections due to the products being sold in supermarkets where drug residue tests are  
578 performed.

#### 579 *Technical and financial barriers to the implementation of regulations at local level*

580 Locally, respondents stressed the technical and financial barriers to implementing the  
581 new regulations. First, in some areas, there were not enough certified veterinarians for the  
582 number of farmers, especially given the large number of small-scale farms. Thus, due to a  
583 shortage of qualified veterinarians, systematic prescriptions for the purchase of AB would  
584 be impossible to implement.

585

586 “In some remote areas, people do not have advanced training; this includes  
587 veterinarians who do not have practice certificates as they have very little work,  
588 with only a few small-scale livestock farms.” (IW23, local veterinary service)

589

590 Small-scale farms lacked both alternatives to antibiotics and adequate biosecurity  
591 measures, leading to a high disease incidence. This justified the preventive use of  
592 antibiotics, whose usage is also recommended by drug sellers. This was exacerbated by the  
593 forecast in Vietnam, with frequent changes in weather. Advice on biosecurity was perceived  
594 as scarce, as farms were rarely visited by veterinarians. Biosecurity was also not considered  
595 a priority by farmers. Alternative products were perceived as more expensive than  
596 antibiotics and available in inappropriate packaging. Moreover, they were usually not  
597 approached by an alternative company, as stated by one representative of this actor  
598 category. Large-scale farms had easier access to alternatives because alternative medicine  
599 companies provided free trials and technical advice. However, some farmers and drug  
600 sellers reported using garlic, herbs, or vitamins on a regular basis. University research was  
601 also underway in one of the study districts on the use of herbs to improve disease treatment  
602 and meat quality.

#### 603 *Informal distribution channels*

604 The informal market was perceived as a barrier to the implementation of new  
605 regulations. Indeed, unlicensed products from Vietnam were imported across the Chinese  
606 border and then sold over to agencies via the internet or distributors. The government  
607 lacked capacity to control this illegal flow of antibiotics as informal vendors were perceived

608 to be powerful, while the business generated a lot of money. As a result, most shops sold  
609 low-quality (diluted) drugs and banned substances.

610

611 “Counterfeit drugs with less than 70% content are common in Vietnam. This affects  
612 vets making prescriptions. Drugs are used according to instructions and are found to  
613 be inefficient, so they need to double the amount of drugs, which creates antibiotic  
614 resistance.” (IW4, local veterinary service)

615

616 Farmers continued to buy banned antibiotics because they were perceived to be more  
617 effective. To the contrary, poor-quality drugs were perceived as a major issue that the  
618 government should address. Respondents also reported the presence of unlicensed shops  
619 run by people without practice certificates.

620

### 621 *International influence*

622 The Vietnamese government developed its NAP and implemented corresponding  
623 regulations, partly to respond to international demand. These regulations were strongly  
624 influenced by foreign technical experts and were therefore similar to European regulations.  
625 However, some respondents had a negative perception of this international influence.  
626 Indeed, as Vietnamese breeding conditions differed from those in Europe, they identified  
627 that some regulations were poorly suited to the context and difficult to implement.

628 For companies that must follow the international trend of reducing antibiotics in order  
629 to export their products, the international influence was seen as a motivation. Indeed,  
630 complying with these regulations was a step toward reaching the food safety standards  
631 required for the international market.

### 632 *Consumers demand for food safety*

633 Producing higher-quality food that could be sold for a higher price was a motivation at  
634 all levels and in all sectors. Indeed, respondents reported that consumers were more aware  
635 of ABR and food quality issues and that farmers had to progressively comply with  
636 consumers’ demands. However, because not all consumers had the possibility to pay a  
637 higher price for chickens, this lever was still identified as moderate. Household farmers also  
638 reported not using AB in their flock to protect their health.

639 Companies had started to develop labels for chicken produced with less antibiotics or  
640 fed with herbs that better suit urban consumer demand. Moreover, the VietGAHP certificate  
641 was needed to sell to supermarkets. The requirements to get this certification included,  
642 among others, the recording of ABU and the absence of AB residues. These alternative  
643 medicine companies were also driven by the desire to create safer products.

644

645 “I know that some companies have really made it part of their strategy to reduce the  
646 use of antibiotics. So we’re going to discuss how to support this via our solutions and  
647 farm management. (...) Some integrators are aiming for 0 AB in line with European  
648 practices.” (IW32, alternative feed additives company)

### 649 *Reducing the burden of antibiotic resistance*

650 Reducing the burden of ABR to protect public health was a motivation shared by  
651 governmental authorities (up to the provincial level), researchers, and a variety agencies,  
652 distributors, and alternative medicine companies. By developing the antimicrobial

653 resistance Sub-Steering Committee, the Vietnamese government has shown that ABR is now  
654 considered an important issue. The National Institute of Veterinary Research (NIVR) was  
655 identified as playing a central role in this committee, but one international partner reported  
656 no longer being involved in the process. The central government perceived itself as having a  
657 responsibility for public health to tackle the ABR threat.

658 The private sector was also concerned about ABR as a public health issue. But some  
659 veterinarians and agency level 1 and 2 representatives explained that reducing the burden  
660 of ABR resulted in increased profits for them. Indeed, according to them, farmers using less  
661 antibiotics will earn more money and be able to buy more supplies from their shop. Indeed,  
662 many agencies sold to farmers on credit. Additionally, mandatory prescriptions were  
663 perceived as an economic advantage for drug sellers. Indeed, farmers will have to rely on  
664 veterinarians to use the correct dosage of drugs, which will lead not only to accurate advice  
665 to limit the development of resistance but also an increase in their income. Using less AB  
666 was also associated with reducing production costs for farmers and integrated companies.

667

668

669

## Discussion

670 This study aimed to understand whether stakeholders in the veterinary drug value chain  
671 in Vietnam understood, accepted, and implemented regulations to reduce ABU, with a focus  
672 on the ban of AB in feed (decree n°13/2020/ND-CP) and mandatory prescription (circular  
673 n°122020TT-BNNPTNT). To that end, we first obtained a comprehensive representation of  
674 the antibiotics and alternative feed additives value chain, as well as a description of the  
675 interactions between the different stakeholder categories. We distinguished between  
676 stakeholders operating at the national level and the local level. We then identified the  
677 technical and social capital of each stakeholder in relation to the regulations designed to  
678 reduce ABU. We showed that the level of understanding, acceptance, and implementation of  
679 the new regulations varied according to the structural position and influence of the  
680 stakeholders within the chain. The level of influence, which depends on their level of  
681 legitimacy, resources, connections, and roles in the legislative process, seemed to be higher  
682 for drug companies, feed companies, alternative feed additives companies, and integrators  
683 than for farmers, level 1 and 2 agencies, and veterinarians. Finally, the first two steps  
684 allowed us to identify 10 factors that had a neutral, negative, or positive influence on the  
685 implementation of the new regulations. According to the respondents, the high proportion  
686 of small-scale farms represented one of the main barriers to their implementation, whereas  
687 large-scale production systems seemed to be the most adaptable to regulatory change and  
688 thus the least directly impacted. At the local level, a lack of knowledge about ABU and ABR,  
689 the regulations themselves, and their objectives were reported to be important barriers.  
690 Finally, enablers to implement regulations were concerned about ABR as a health risk and  
691 food safety issue for all stakeholders.

692

693 Advantages and bias of conducting an iterative stakeholder mapping and analysis

694 In this study, we explored the structural position and technical and social capital of the  
695 stakeholders regarding the regulations related to ABR through a systemic (Peters, 2014)  
696 and interdisciplinary approach to develop recommendations adapted to the Vietnamese  
697 context (Kakkar et al., 2018). We aimed to translate policy changes into changes of practice

698 that would effectively reduce the use of antibiotics in chicken production (Baudoin et al.,  
699 2021). To accomplish this, we conducted an iterative stakeholder mapping and analysis  
700 (SMA). SMA is a method to assess how future policies will be understood by the impacted  
701 stakeholders or to support their implementation (Mayers, 2005; Zimmermann &  
702 Maennling 2007; Reed et al., 2009; Godakandage et al., 2017) by identifying key  
703 stakeholders, characterizing them, describing their interactions, and exploring their  
704 technical and social capital regarding the future policy and their level of influence on its  
705 implementation. In fine, it provides relevant information to support the formulation of  
706 recommendations to improve the effectiveness of these future policies. This approach has  
707 already been applied to ABR surveillance programs in Vietnam (Bordier et al., 2018) and  
708 the antibiotic value chain in Laos (Poupaud et al., 2021). By exploring barriers to the  
709 implementation of new regulations using a participatory approach, we identified systemic  
710 lock-ins (economical, political, technical, and social) to reducing antibiotic usage in chicken  
711 production in Vietnam (Baudoin et al., 2021).

712 However, we recognize that our study has some limitations. To begin, almost all of the  
713 interviews were conducted online due to the health crisis. Although this format represents  
714 great interest when interviews cannot be conducted face-to-face, several biases can be  
715 identified. Direct observations are reduced, and information is lost (lack of informal  
716 discussions, misunderstandings, longer time to build trust, and more complicated  
717 debriefing). Another limitation may have been the sensitivity of the subject to the  
718 participants. Indeed, these regulations are already enforced or will be soon, and  
719 participants might have been worried about the consequences of expressing their true  
720 opinions. We attempted to reduce this bias by interviewing several respondents from the  
721 same category and gathering information from the perspective of other participants.  
722 However, we failed to contact informal stakeholders who could have helped us further  
723 describe the informal value chain. Due to time and technical constraints, we only  
724 interviewed one representative for some categories of stakeholders. Thus, it might have  
725 been relevant to interview another district veterinarian to clarify their role in the drug  
726 value chain. Finally, translation might also have caused misunderstandings. We are also  
727 aware that the representation of the veterinary drug value chain may be incomplete, as it is  
728 based on stakeholder interviews and reflects the situation at the time of data collection in  
729 2021.

730 The inclusion or exclusion of some categories of stakeholders may influence the  
731 conclusions drawn and introduce bias because of their different perspectives on the  
732 regulations. Small farmers have been blamed for AB misuse and low regulatory compliance.  
733 However, our sample lacked small farmers compared to other stakeholders, and we did not  
734 their perspectives on their role in ABR as identified by other stakeholders. Thus, additional  
735 research is needed to investigate farmers' perceptions about the ABU reduction and to  
736 identify how they adapt to the need for changing practices.

737

### 738 Influence of stakeholders on the implementation of regulations

739 The Sub-DAHLP appeared to be the link between the central level and local  
740 stakeholders. They had field expertise and were consulted by the upper level, while they  
741 transmitted information on ABR, ABU, and regulations to the lower level. They were in  
742 contact with drug sellers, veterinarians, and farmers (though they were unable to inspect  
743 all farms), as well as researchers. However, respondents reported differences between

744 provinces on regulatory implementation, which might impact the benefits of the regulatory  
745 changes. National private stakeholders were consulted on the design of the new legislation,  
746 and we saw better understanding, compliance, and adaptability among these stakeholders.  
747 They were also better controlled by the competent authorities. They were motivated to  
748 reduce their ABU to access the international market and export their products. However,  
749 our study was unable to determine the exact influence of private companies on the design  
750 of the law. Local stakeholders were not involved in the process and showed a lower level of  
751 understanding and compliance. Nevertheless, they were identified as key stakeholders in  
752 achieving objectives due to their position in the chain as end-users and must be more  
753 involved.

754 International partners perceived themselves as having a moderate influence on the  
755 legislative process. However, in Vietnam, ABU and ABR monitoring remained dependent on  
756 research projects, and legislation was partly developed based on the recommendations of  
757 international researchers. The NAP was adopted in response to a call from international  
758 organizations (OMS, 2015) and influenced by international stakeholders, even though the  
759 final decision rests with the government. Regulations were sometimes identified too far  
760 away from Vietnamese reality. Consequently, these regulations developed by national  
761 authorities under the influence of international factors may favor production intensification  
762 in Vietnam. As explained by one participant, the policy to intensify the farms was done  
763 without the farmers' involvement. To be effective, regulations need to be adapted to the  
764 context rather than simply copied from another country's regulations (Kirchhelle et al.,  
765 2020). For example, there were still a large number of small retailers who lacked the legally  
766 required practice certificates or qualifications, and they were the only source of antibiotics  
767 in remote areas. In this case, strict regulation could limit small-scale farmers' access to  
768 antibiotics.

#### 769 Difficulties to implement the regulations

770 Our study showed that the new regulations would be difficult to implement in Vietnam  
771 in the short term, and that local compliance could take longer than anticipated. Indeed, even  
772 though antibiotics have been banned for growth promotion since 2018 (National Assembly,  
773 2018), respondents still reported mixing AB with feed on the farm. This result contradicted  
774 previous studies that did not report the usage of antibiotics for growth promotion (Pham-  
775 Duc et al., 2019; Luu et al., 2021; Bâtie et al., 2022). This disparity could be explained by the  
776 data collection process. Indeed, participatory approaches can reduce communication  
777 barriers and stimulate discussion (Bordier et al., 2018). This finding is consistent with  
778 several studies that have shown that the regulatory enforcement of antibiotic usage is low  
779 or absent in low- and middle-income countries (LMICs), particularly in Vietnam (Nguyen et  
780 al., 2013). The new NAP issued in 2021 also highlighted the need for better regulatory  
781 enforcement to fight against ABR (MARD, 2021), and an analysis of NAP in Southeast Asia  
782 reached the same conclusion (Chua et al., 2021).

783 Not all local stakeholders who will be affected by mandatory prescriptions in a few  
784 years' time were aware of the regulatory changes, and most of the respondents at different  
785 levels did not believe that they would be implemented soon. In veterinary medicine, buying  
786 antibiotics over the counter is a common practice driven by farmers' experience-based  
787 antibiotic usage (Carrique-Mas et al., 2015; Truong et al., 2019; Bâtie et al., 2022) as it is  
788 also in human medicine (McKinn et al., 2021). Moreover, people without a practice  
789 certificate or veterinary training sell drugs (usually to a relative of the shop owner) and are

790 therefore not allowed to issue prescriptions. In countries where over-the-counter drugs are  
791 highly regulated, the rate of self-medication is significantly lower than in Southeast Asia,  
792 where drugs are widely available. Self-medication leads to antibiotic misuse and overuse  
793 (Nepal & Bhatta, 2018). Changing farmers' habits (especially among the older generation  
794 and for small scale farms) was perceived as difficult in Vietnam because they are using AB  
795 according to their own experience or their neighbor's experiences. The implementation of  
796 this essential regulation in the fight against ABR will therefore require the development of  
797 tailored solutions.

#### 798 Solutions to improve the implementation of the new regulations

799 Several respondents stressed the need to clarify regulations and strengthen sanctions to  
800 improve their implementation. These sanctions should be more clearly defined, stricter, and  
801 systematic. This would require clear guidance, a distribution of tasks, and more resources  
802 for the authorities, including technical and human capacities (Jamrozik & Selgelid, 2020).  
803 Participants suggested random on-farm feed inspections or targeting drug sellers to incur a  
804 domino effect. We also identified an informal flow of antibiotics leading to the sale and  
805 usage of banned substances. This informal flow has already been described in aquaculture  
806 systems (Brunton et al., 2019), and producers have reported using banned substances  
807 (Pham-Duc et al., 2019). Respondents also raised drug quality concerns, including the  
808 presence of diluted antibiotics, which led to higher antibiotic dosages. This finding was  
809 consistent with a previous study conducted among farmers in the Mekong Delta (Yen et al.,  
810 2019) and is also an issue in other Southeast Asia countries (Pham-Duc &  
811 Sriparamanathan, 2021).

812 Most respondents believe that reducing the proportion of small-scale farms in favor of  
813 large-scale farms and integrated systems would help to alleviate the ABR burden. Small-  
814 scale farms have often been blamed for AB misuse and overuse in Vietnam and worldwide  
815 (Ducrot et al., 2021) and identified as stakeholders who fail to comply with regulations due  
816 to their lack of adaptability (Pham-Duc & Sriparamanathan, 2021). The solution of  
817 reducing the number of small scale farms is in line with the government's strategy outlined  
818 in the agriculture development plan for 2025 (Prime Minister, 2021). This was also true in  
819 2003, during the highly pathogenic avian influenza crisis, when industrial production was  
820 pushed through partnership between the public and agro-industrial sectors, because  
821 integrated farms were perceived as implementing better biosecurity (Figuié et al., 2013).  
822 However, this study demonstrated that, due to consumer preference for the local market,  
823 only the most competitive ones developed. Also, as one respondent pointed out, increasing  
824 the size of farms does not always result in a reduction in ABU, and increasing size without  
825 adequate training can have negative consequences for ABU control. Moreover, intensive  
826 systems were also reported as heavy users of AB, especially in prophylaxis (Luu et al., 2021;  
827 Bâtie et al., 2022). Furthermore, small-scale production has been shown in many regions to  
828 be a source of women's empowerment, financial reserves, an important element for  
829 ceremonies, and a contributor to nutrition (Alders et al., 2018). It also represents social  
830 benefit and reinforces the relationship between householders (Dumas et al., 2018). Another  
831 study in Ethiopia found that as farm size increases, men usually take control, reducing the  
832 independence of women (Sambo et al., 2015). In Vietnam, the population is predominantly  
833 rural, and small-scale farmers still represent the most common production systems.  
834 Demand varies according to cultural events; for example, chickens are highly consumed  
835 during the Lunar New Year, and many smallholders only raise chickens for this occasion



836 (Delabougliise et al., 2017). In Southeast Asia, the knowledge and practices of men and  
837 women regarding AB differ depending on the context (education, socio-economic factors)  
838 (Pham-Duc & Sriparamanathan, 2021). Thus, social factors must be taken into account  
839 when developing livestock production (Sambo et al., 2015; Dumas et al., 2018).

840 We found that small scale farms have difficulty complying with the new regulations  
841 because they lack the technical capacity to implement them. Small scale and medium scale  
842 farms in Vietnam have poor biosecurity and resulting in high disease incidences, also  
843 aggravated by climatic conditions, leading to a high usage of antibiotics for prevention. In  
844 consequence, the reduction in ABU was perceived to have a negative impact on their  
845 income. A survey of farmers, retailers, and veterinarians in Cambodia revealed that farms  
846 with higher levels of biosecurity used fewer antibiotics (Ornelas-Eusebio et al., 2020).  
847 Strengthening biosecurity is a target of the government, which is now developing  
848 biosecurity guidelines and projects focusing on biosecurity to improve the training of  
849 trainers with the National Agriculture Extension Center. Feed additives and probiotics are  
850 common in Vietnam and are necessary supplements, but respondents reported a lack of  
851 alternatives to antibiotics and the high price of these products.

852 In our study, the lack of knowledge among farmers and drug sellers, as well as some  
853 local authorities, is a barrier to the implementation of the new regulations. Because a lack of  
854 awareness of ABU and ABR's broader impact drives ABU (Brunton et al., 2019), many  
855 studies have identified education programs as key interventions to improve ABU, which has  
856 increased the adoption of the regulations. Some respondents were aware that ABR can  
857 have serious consequences for human health, as highlighted in another study (Pham-Duc et  
858 al., 2019) and we found that reducing the ABR burden could also act as a lever in reducing  
859 ABU. Raising awareness already figures among the NAP objectives and has been carried  
860 over to the second NAP. In Vietnam, this is achieved through mass media channels, TV  
861 programs, or workshops organized at different levels. Respondents stated that, in addition  
862 to the communication campaign, more training of local stakeholders was required.  
863 Stakeholders must also be aware of the change in regulations, which did not seem to be the  
864 case for local stakeholders. According to the respondents, information on new regulations  
865 should be disseminated more widely, particularly locally. This could be done by organizing  
866 workshops with district or communal veterinarians. Finally, to raise compliance with  
867 regulations, relevant stakeholders must understand the objective of the law. Indeed,  
868 farmers did not always understand the link between ABU reduction and ABR, as well as the  
869 link between AB residues and ABR, as observed in Cambodia. Farmers and drug sellers did  
870 not see the real benefit of the law, and as the fight against ABR is long-term, they tended to  
871 focus on their daily problems. In Cambodia, farmers were identified as focusing more on the  
872 benefits of their production rather than on the consequences of antibiotic use (Om &  
873 McLaws, 2016).

874 Several stakeholders identified drugstores as critical components of the antibiotic  
875 reduction strategy. Moreover, according to the respondents, drugstores would be easier to  
876 manage than farmers because there were fewer of them. By raising awareness of good  
877 husbandry practices, they would then be able to provide farmers with advice. Mandatory  
878 prescription was sometimes perceived positively by this category of stakeholders as it  
879 would attract more customers and enhance the quality of advice. If farmers had fewer  
880 livestock diseases to manage, they would have higher incomes and would be willing to pay  
881 for the products. It would therefore be a win-win situation for them. In a previous study,  
882 drugstores were identified as the primary point of contact for farmers because they sell  
883 antibiotics and provide advice (Doan Hoang et al., 2019; Bâtie et al., 2022).

884 Increasing consumer willingness and showing the importance of producing better  
885 quality chicken could also have a leverage effect, as it has already been shown that  
886 consumers are afraid of chemical risks related to food safety (Nguyen-Viet et al., 2017).  
887 Producing safer food to meet consumer demand was also a motivation to comply with the  
888 regulations. Further studies are needed to assess the influence of consumers on changing  
889 the practices of veterinary drug value chain stakeholders.  
890

## 891 Conclusion

892 The development of a regulatory framework to reduce AB misuse in chicken production  
893 in Vietnam is a necessary step towards changing ABU practices. However, this cannot be  
894 done in isolation and should be combined with other measures tailored to the specific  
895 context of implementation. This study identified levers that could be used to influence ABU  
896 practice.

897 Regulations in Vietnam were partially ignored because relevant stakeholders were too  
898 far away from the decision-making system and did not feel concerned about the regulations.  
899 There was also a lack of implementation due to insufficient resources (human, technical,  
900 and knowledge) among stakeholders in charge of enforcing the regulations, especially for  
901 small-scale farms. Improving communication at the local level on regulations and their  
902 purpose in the direction of local stakeholders would help to increase compliance. Moreover,  
903 new policies should take into account the most vulnerable stakeholders, such as farmers  
904 and drug sellers.

905

## Acknowledgements

906 We are grateful to all the respondents who participated in the study. We are thankful to  
907 Nguyen Thi Nga for the data collection in north Vietnam and Le Thi Thu Hà and Ding Bao  
908 Truong for the data collection in south Vietnam. We would also like to thank Anita Saxena  
909 for the professional English proofreading. Part of this work has previously appeared online  
910 as part of the thesis of Chloé Bâtie .

911

## Funding

912 This study is part of the ROADMAP (Rethinking of Antimicrobial Decision-Systems in the  
913 Management of Animal Production) project and has received funding from the European  
914 Union's Horizon 2020 research and innovation program under Grant Agreement No.  
915 817626. This work was also funded in part by the GREASE platform in partnership ([www.grease-network.org](http://www.grease-network.org)).  
916

917

## Conflict of interest disclosure

918 The authors declare that the research was conducted in the absence of any commercial  
919 or financial relationships that could be construed as a potential conflict of interest.

920

921

## References

- 922 Alders RG, Dumas SE, Rukambile E, Magoke G, Maulaga W, Jong J, Costa R (2018) Family  
923 poultry: Multiple roles, systems, challenges, and options for sustainable contributions to  
924 household nutrition security through a planetary health lens. *Maternal & Child Nutrition*,  
925 **14(S3)**, e12668. <https://doi.org/10.1111/mcn.12668>
- 926 Bâtie C, Le Thi Thu H, Loire E, Truong DB, Ha Minh T, Ngo Thi Kim C, Paul M, Goutard F  
927 (2022) Characterisation of chicken farms in Vietnam: A typology of antimicrobial use  
928 among different production systems. *Preventive Veterinary Medicine*, **208**, 105731.  
929 <https://doi.org/10.1016/j.prevetmed.2022.105731>
- 930 Baudoin F, Hogeveen H, Wauters E (2021) Reducing Antimicrobial Use and Dependence in  
931 Livestock Production Systems: A Social and Economic Sciences Perspective on an  
932 Interdisciplinary Approach. *Frontiers in Veterinary Science*, **8**, 584593.  
933 <https://doi.org/10.3389/fvets.2021.584593>
- 934 Bordier M, Binot A, Pauchard Q, Nguyen DT, Trung TN, Fortané N, Goutard FL (2018)  
935 Antibiotic resistance in Vietnam: moving towards a One Health surveillance system. *BMC*  
936 *Public Health*, **18**, 1136. <https://doi.org/10.1186/s12889-018-6022-4>
- 937 Brugha R (2000) Stakeholder analysis: a review. *Health Policy and Planning*, **15**, 239–246.  
938 <https://doi.org/10.1093/heapol/15.3.239>
- 939 Brunton LA, Desbois AP, Garza M, Wieland B, Mohan CV, Häsler B, Tam CC, Le PNT, Phuong  
940 NT, Van PT, Nguyen-Viet H, Eltholth MM, Pham DK, Duc PP, Linh NT, Rich KM, Mateus  
941 ALP, Hoque MdA, Ahad A, Khan MNA, Adams A, Guitian J (2019) Identifying hotspots for  
942 antibiotic resistance emergence and selection, and elucidating pathways to human  
943 exposure: Application of a systems-thinking approach to aquaculture systems. *Science of*  
944 *The Total Environment*, **687**, 1344–1356.  
945 <https://doi.org/10.1016/j.scitotenv.2019.06.134>
- 946 Carrique-Mas JJ, Trung NV, Hoa NT, Mai HH, Thanh TH, Campbell JI, Wagenaar JA, Hardon A,  
947 Hieu TQ, Schultsz C (2015) Antimicrobial Usage in Chicken Production in the Mekong  
948 Delta of Vietnam. *Zoonoses and Public Health*, **62**, 70–78.  
949 <https://doi.org/10.1111/zph.12165>
- 950 Castleberry A, Nolen A (2018) Thematic analysis of qualitative research data: Is it as easy as  
951 it sounds? *Currents in Pharmacy Teaching and Learning*, **10**, 807–815.  
952 <https://doi.org/10.1016/j.cptl.2018.03.019>
- 953 Catley A, Alders RG, Wood JLN (2012) Participatory epidemiology: Approaches, methods,  
954 experiences. *The Veterinary Journal*, **191**, 151–160.  
955 <https://doi.org/10.1016/j.tvjl.2011.03.010>
- 956 Chua AQ, Verma M, Hsu LY, Legido-Quigley H (2021) An analysis of national action plans on  
957 antimicrobial resistance in Southeast Asia using a governance framework approach. *The*  
958 *Lancet Regional Health: Western Pacific*, **7**, 100084.  
959 <https://doi.org/10.1016/j.lanwpc.2020.100084>
- 960 Delabougliise A, Choisy M, Phan TD, Antoine-Moussiaux N, Peyre M, Vu TD, Pfeiffer DU,  
961 Fournié G (2017) Economic factors influencing zoonotic disease dynamics: demand for  
962 poultry meat and seasonal transmission of avian influenza in Vietnam. *Scientific Reports*,  
963 **7**, 5905. <https://doi.org/10.1038/s41598-017-06244-6>
- 964 Doan Hoang P, Vu Thi Quynh G, Truong DB, Nguyen Van C, Bach Tuan K, Vo Be H, Thwaites  
965 G, Rushton J, Carrique-Mas J (2019) Veterinary Drug Shops as Main Sources of Supply  
966 and Advice on Antimicrobials for Animal Use in the Mekong Delta of Vietnam. *Antibiotics*,  
967 **8**, 195. <https://doi.org/10.3390/antibiotics8040195>

- 968 Ducrot C, Hobeika A, Lienhardt C, Wieland B, Dehays C, Delabouglise A, Bordier M, Goutard  
969 F, Patel E, Figuié M, Peyre M, Moodley A, Roger F (2021) Antimicrobial Resistance in  
970 Africa—How to Relieve the Burden on Family Farmers. , 27.  
971 <https://doi.org/10.3201/eid2710.210076>
- 972 Dumas SE, Maranga A, Mbullo P, Collins S, Wekesa P, Onono M, Young SL (2018) “Men Are  
973 in Front at Eating Time, but Not When It Comes to Rearing the Chicken”: Unpacking the  
974 Gendered Benefits and Costs of Livestock Ownership in Kenya. *Food and Nutrition*  
975 *Bulletin*, 39, 3–27. <https://doi.org/10.1177/0379572117737428>
- 976 Figuié M, Pham AT, Moustier P (2013) Grippe aviaire dans la filière. La réorganisation du  
977 secteur agro-industriel au Vietnam. *Revue d'Études en Agriculture et Environnement*, 94,  
978 397–420. <https://doi.org/10.4074/S1966960713014021>
- 979 Godakandage SSP, Senarath U, Jayawickrama HS, Siriwardena I, Wickramasinghe SWADA,  
980 Arumapperuma P, Ihalagama S, Nimalan S, Archchuna R, Umesh C, Uddin S, Thow AM  
981 (2017) Policy and stakeholder analysis of infant and young child feeding programmes in  
982 Sri Lanka. *BMC Public Health*, 17. <https://doi.org/10.1186/s12889-017-4342-4>
- 983 Government of the Socialist Republic of Vietnam (2020) *Decree detailing a number of*  
984 *articles of the Law on Animal Husbandry*.
- 985 GSOV (2016) *Results of the rural, agricultural and fishery census 2016*. General Statistics  
986 Office of Vietnam, Hanoi.
- 987 Jamrozik E, Selgelid M (Eds.) (2020) *Ethics and Drug Resistance: Collective Responsibility*  
988 *for Global Public Health*. Springer International Publishing, Cham.  
989 <https://doi.org/10.1007/978-3-030-27874-8>
- 990 J.D. Cesaro, G. Duteurtre, Nguyen Mai Huong (2019) *Atlas de la transition de l'élevage au*  
991 *Vietnam (1986-2016)*. IPSARD-CIRAD.
- 992 Kakkar M, Chatterjee P, Chauhan AS, Grace D, Lindahl J, Beeche A, Jing F, Chotinan S (2018)  
993 Antimicrobial resistance in South East Asia: time to ask the right questions. *Global Health*  
994 *Action*, 11. <https://doi.org/10.1080/16549716.2018.1483637>
- 995 Kim DP, Saegerman C, Douny C, Ton V, Xuan BH, Dang Vu B (2013) First survey on the use  
996 of antibiotics in pig and poultry production in the Red River Delta region of Vietnam.  
997 *Food Pub Health*, 3(5), 247–256. <https://doi.org/10.5923/j.fph.20130305.03>
- 998 Kirchhelle C, Atkinson P, Broom A, Chuengsatiansup K, Ferreira JP, Fortané N, Frost I,  
999 Gradmann C, Hinchliffe S, Hoffman SJ, Lezaun J, Nayiga S, Outtersson K, Podolsky SH,  
1000 Raymond S, Roberts AP, Singer AC, So AD, Sringernyuang L, Tayler E, Rogers Van Katwyk  
1001 S, Chandler CIR (2020) Setting the standard: multidisciplinary hallmarks for structural,  
1002 equitable and tracked antibiotic policy. *BMJ Global Health*, 5.  
1003 <https://doi.org/10.1136/bmjgh-2020-003091>
- 1004 Luu QH, Nguyen TLA, Pham TN, Vo NG, Padungtod P (2021) Antimicrobial use in household,  
1005 semi-industrialized, and industrialized pig and poultry farms in Viet Nam. *Preventive*  
1006 *Veterinary Medicine*, 189, 105292. <https://doi.org/10.1016/j.prevetmed.2021.105292>
- 1007 MARD (2017) *The National Action Plan for Management of Antibiotic Use and Control of*  
1008 *Antibiotic Resistance in Livestock Production and Aquaculture during the period of*  
1009 *2017-2020*.
- 1010 MARD (2020) *Circular on management of veterinary drugs containing narcotic substances*  
1011 *and precursors and veterinary prescription*.
- 1012 MARD (2021) *The National Action Plan on Preventing and Combating Antibiotic resistance*  
1013 *in the Agricultural Sector for the period 2021-2025 (In Vietnamese)*.
- 1014 Mayers J (2005) *Stakeholder power analysis*. International Institute for Environment and  
1015 Development.

- 1016 McEwen SA, Collignon PJ (2018) Antimicrobial Resistance: a One Health Perspective (FM  
1017 Aarestrup, S Schwarz, J Shen, L Cavaco, Eds.). *Microbiology Spectrum*, **6**, 6.2.10.  
1018 <https://doi.org/10.1128/microbiolspec.ARBA-0009-2017>
- 1019 McKinn S, Trinh DH, Drabarek D, Trieu TT, Nguyen PTL, Cao TH, Dang AD, Nguyen TA, Fox  
1020 GJ, Bernays S (2021) Drivers of antibiotic use in Vietnam: implications for designing  
1021 community interventions. *BMJ Global Health*, **6**, e005875.  
1022 <https://doi.org/10.1136/bmjgh-2021-005875>
- 1023 National Assembly (2015) *Law on veterinary medicine or law on animal health*.
- 1024 National Assembly (2018) *Law on Animal Husbandry*.
- 1025 Nepal G, Bhatta S (2018) Self-medication with Antibiotics in WHO Southeast Asian Region:  
1026 A Systematic Review. *Cureus*. <https://doi.org/10.7759/cureus.2428>
- 1027 Nguyen KV, Thi Do NT, Chandna A, Nguyen TV, Pham CV, Doan PM, Nguyen AQ, Thi Nguyen  
1028 CK, Larsson M, Escalante S, Olowokure B, Laxminarayan R, Gelband H, Horby P, Thi Ngo  
1029 HB, Hoang MT, Farrar J, Hien TT, Wertheim HF (2013) Antibiotic use and resistance in  
1030 emerging economies: a situation analysis for Viet Nam. *BMC Public Health*, **13**, 1158.  
1031 <https://doi.org/10.1186/1471-2458-13-1158>
- 1032 Nguyen-Viet H, Tuyet-Hanh TT, Unger F, Dang-Xuan S, Grace D (2017) Food safety in  
1033 Vietnam: where we are at and what we can learn from international experiences.  
1034 *Infectious Diseases of Poverty*, **6**, 39. <https://doi.org/10.1186/s40249-017-0249-7>
- 1035 Om C, McLaws M-L (2016) Antibiotics: practice and opinions of Cambodian commercial  
1036 farmers, animal feed retailers and veterinarians. *Antimicrobial Resistance & Infection  
1037 Control*, **5**, 42. <https://doi.org/10.1186/s13756-016-0147-y>
- 1038 OMS (2015) *Global action plan on antimicrobial resistance*.
- 1039 O'Neill J (2016) *The Review on Antimicrobial Resistance. Tackling drug-resistant infections  
1040 globally: final report and recommendations*. Review on Antimicrobial Resistance,  
1041 London.
- 1042 Ornelas-Eusebio E, García-Espinosa G, Laroucau K, Zanella G (2020) Characterization of  
1043 commercial poultry farms in Mexico: Towards a better understanding of biosecurity  
1044 practices and antibiotic usage patterns (I Karunasagar, Ed.). *PLOS ONE*, **15**, e0242354.  
1045 <https://doi.org/10.1371/journal.pone.0242354>
- 1046 Peters DH (2014) The application of systems thinking in health: why use systems thinking?  
1047 *Health Research Policy and Systems*, **12**, 51. <https://doi.org/10.1186/1478-4505-12-51>
- 1048 Pham-Duc P, Cook MA, Cong-Hong H, Nguyen-Thuy H, Padungtod P, Nguyen-Thi H, Dang-  
1049 Xuan S (2019) Knowledge, attitudes and practices of livestock and aquaculture  
1050 producers regarding antimicrobial use and resistance in Vietnam (IF Angelillo, Ed.).  
1051 *PLOS ONE*, **14**, e0223115. <https://doi.org/10.1371/journal.pone.0223115>
- 1052 Pham-Duc P, Sriparamanathan K (2021) Exploring gender differences in knowledge and  
1053 practices related to antibiotic use in Southeast Asia: A scoping review (S Clegg, Ed.).  
1054 *PLOS ONE*, **16**, e0259069. <https://doi.org/10.1371/journal.pone.0259069>
- 1055 Pham-Thanh L (2020) Livestock Development in Hanoi City, Vietnam—Challenges and  
1056 Policies. *Frontiers in Veterinary Science*, **7**, 10.
- 1057 Poupaud M, Putthana V, Patriarchi A, Caro D, Agunos A, Tansakul N, Goutard FL (2021)  
1058 Understanding the veterinary antibiotics supply chain to address antimicrobial  
1059 resistance in Lao PDR: Roles and interactions of involved stakeholders. *Acta Tropica*,  
1060 **220**, 105943. <https://doi.org/10.1016/j.actatropica.2021.105943>
- 1061 Prime Minister (2021) *Decision approving the Master plan agricultural restructure in the  
1062 2021-2025 period*.

- 1063 Reed MS, Graves A, Dandy N, Posthumus H, Hubacek K, Morris J, Prell C, Quinn CH, Stringer  
1064 LC (2009) Who's in and why? A typology of stakeholder analysis methods for natural  
1065 resource management. *Journal of Environmental Management*, **90**, 1933–1949.  
1066 <https://doi.org/10.1016/j.jenvman.2009.01.001>
- 1067 Sambo E, Bettridge J, Dessie T, Amare A, Habte T, Wigley P, Christley RM (2015)  
1068 Participatory evaluation of chicken health and production constraints in Ethiopia.  
1069 *Preventive Veterinary Medicine*, **118**, 117–127.  
1070 <https://doi.org/10.1016/j.prevetmed.2014.10.014>
- 1071 de Sardan J-PO (2008) *La rigueur du qualitatif. Les contraintes empiriques de*  
1072 *l'interprétation socio-anthropologique*. Louvain-la-neuve.
- 1073 Truong DB, Doan HP, Doan Tran VK, Nguyen VC, Bach TK, Rueanghiran C, Binot A, Goutard  
1074 FL, Thwaites G, Carrique-Mas J, Rushton J (2019) Assessment of Drivers of Antimicrobial  
1075 Usage in Poultry Farms in the Mekong Delta of Vietnam: A Combined Participatory  
1076 Epidemiology and Q-Sorting Approach. *Frontiers in Veterinary Science*, **6**, 84.  
1077 <https://doi.org/10.3389/fvets.2019.00084>
- 1078 WHO (2019) *Critically Important Antimicrobials for Human Medicine, 6th Revision: 2018*  
1079 *Ranking of medically important antimicrobials for risk management of antimicrobial*  
1080 *resistance due to non-human use*. World Health Organization, Geneva.
- 1081 Yen NTP, Phu DH, Van Cuong N, Kiet BT, Hien BV, Padungtod P, Truong DB, Thwaites GE,  
1082 Carrique-Mas JJ (2019) Labelling and quality of antimicrobial products used in chicken  
1083 flocks in the Mekong Delta of Vietnam. *Veterinary Medicine and Science*, **5**, 512–516.  
1084 <https://doi.org/10.1002/vms3.189>
- 1085 Zimmermann A, Maennling C (2007) *Multi-stakeholder management: Tools for Stakeholder*  
1086 *Analysis: 10 building blocks for designing participatory systems of cooperation*. GTZ,  
1087 Eschborn.  
1088

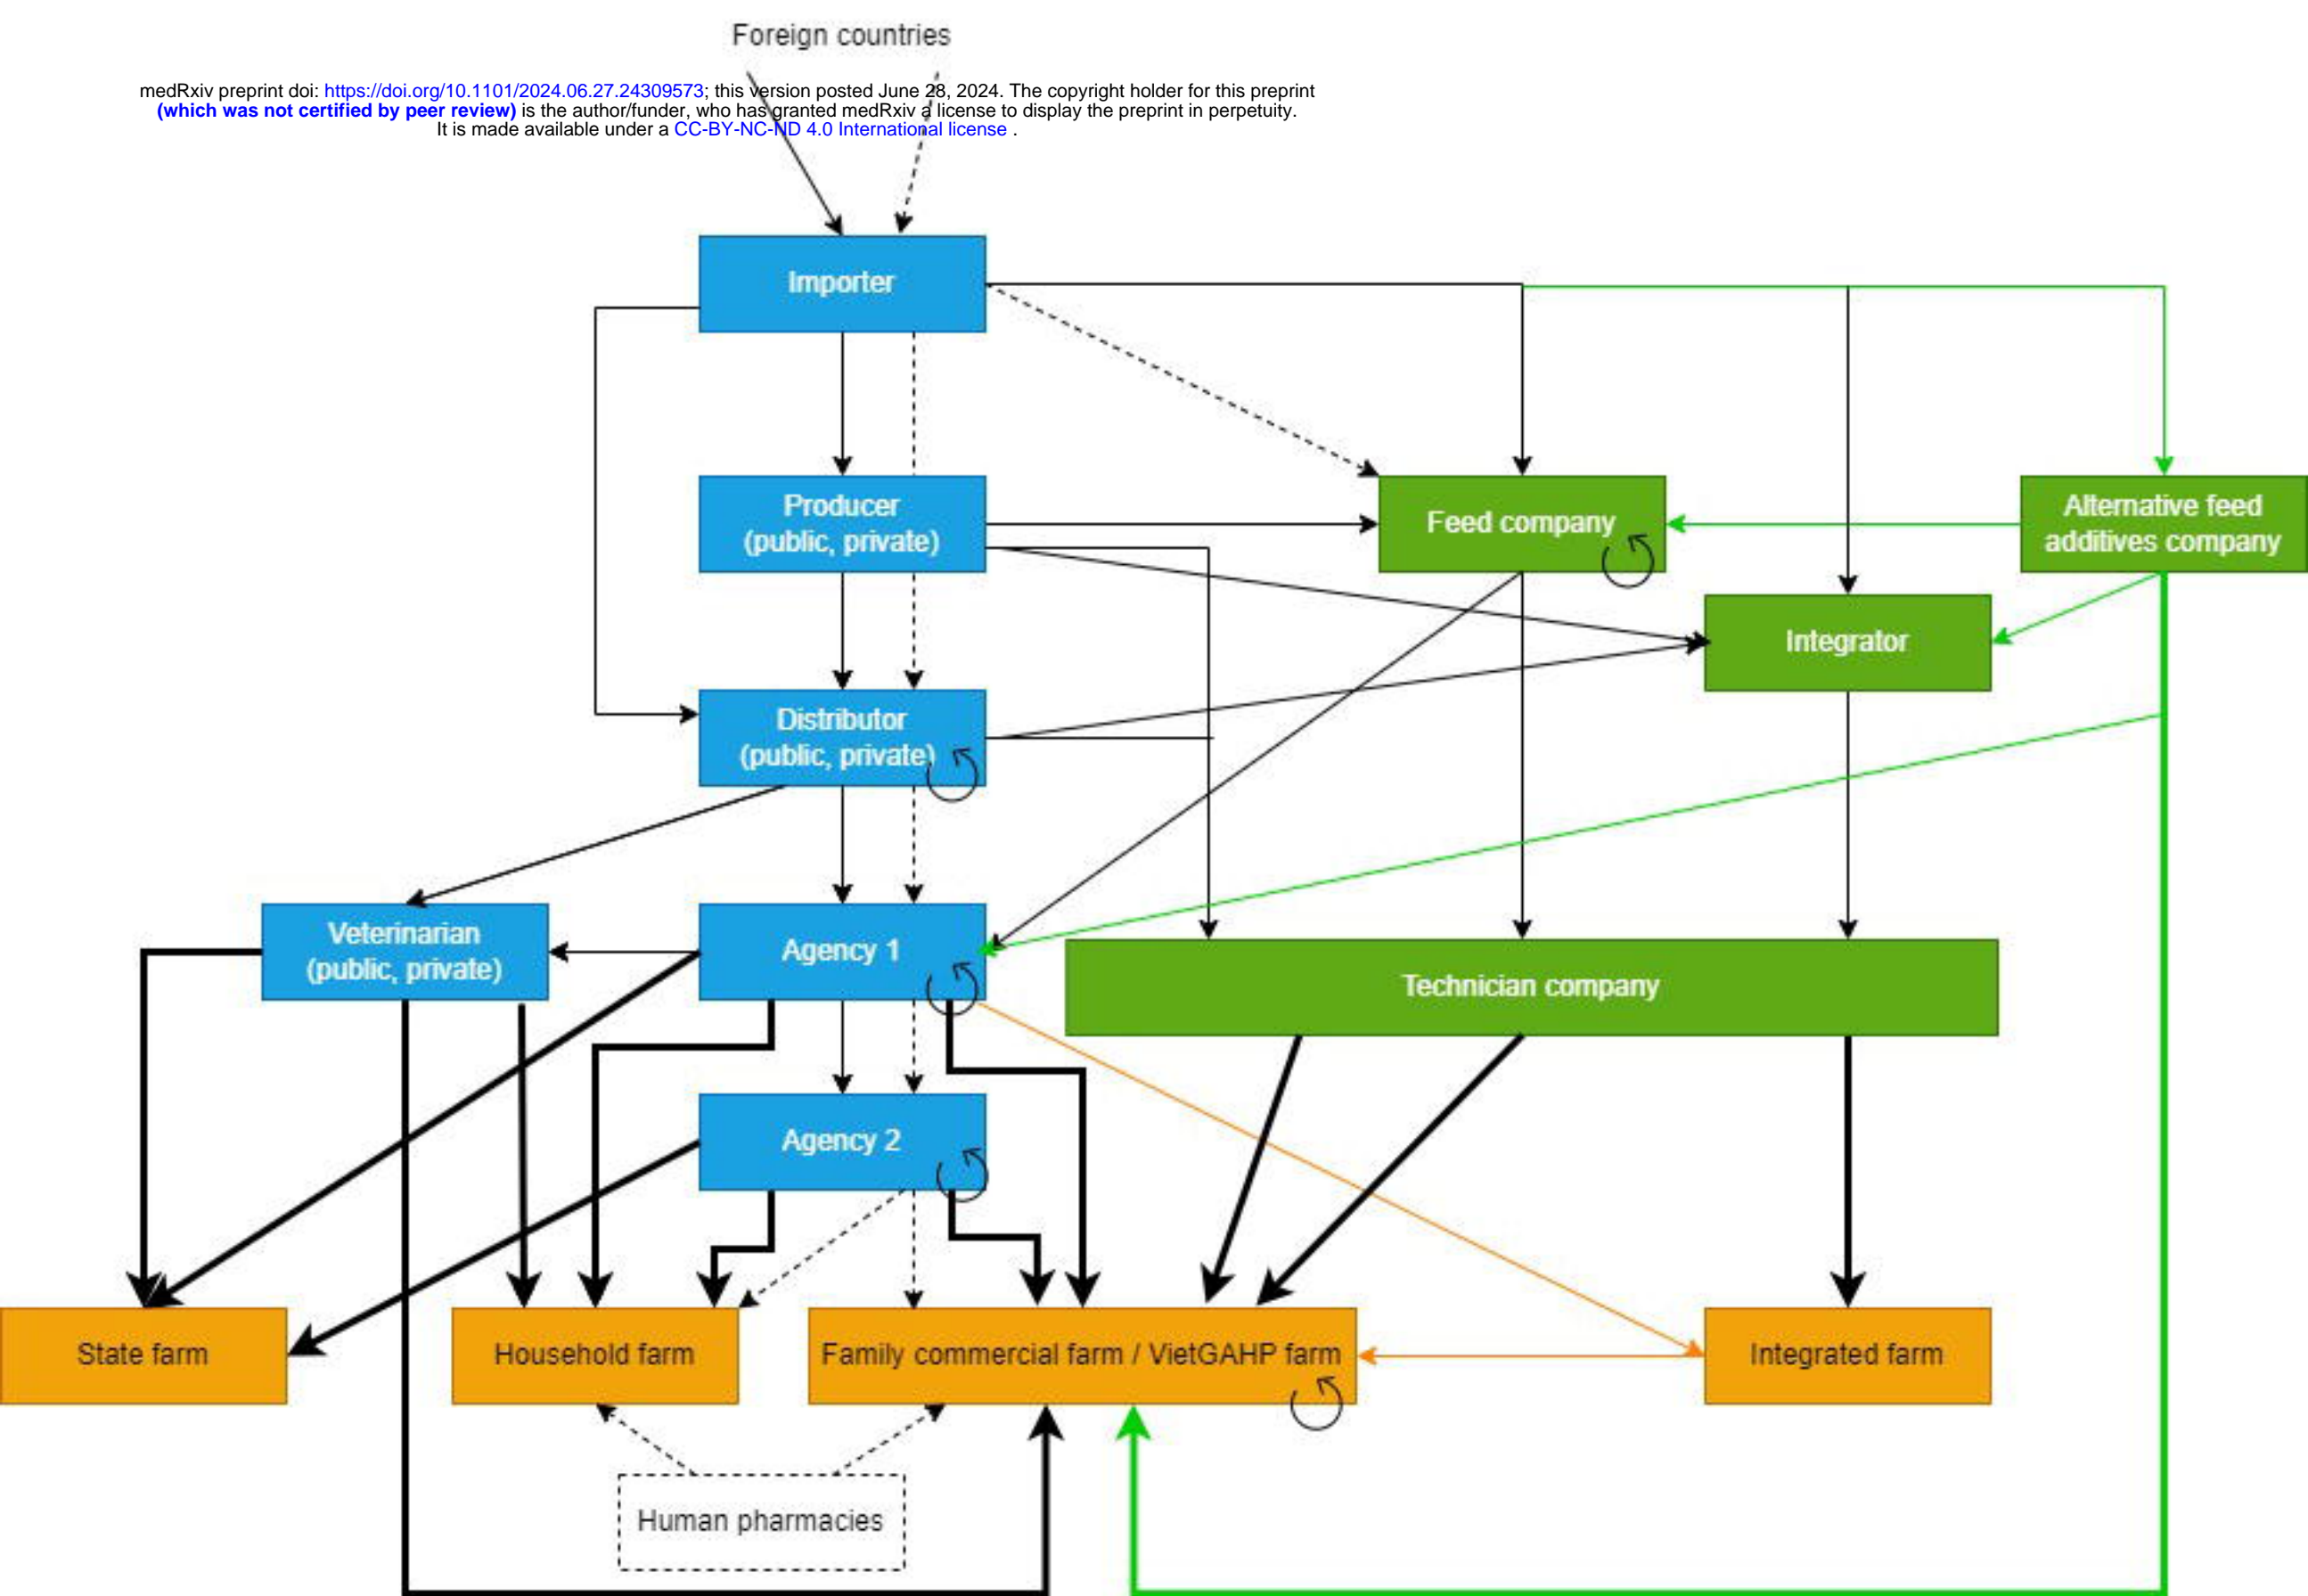



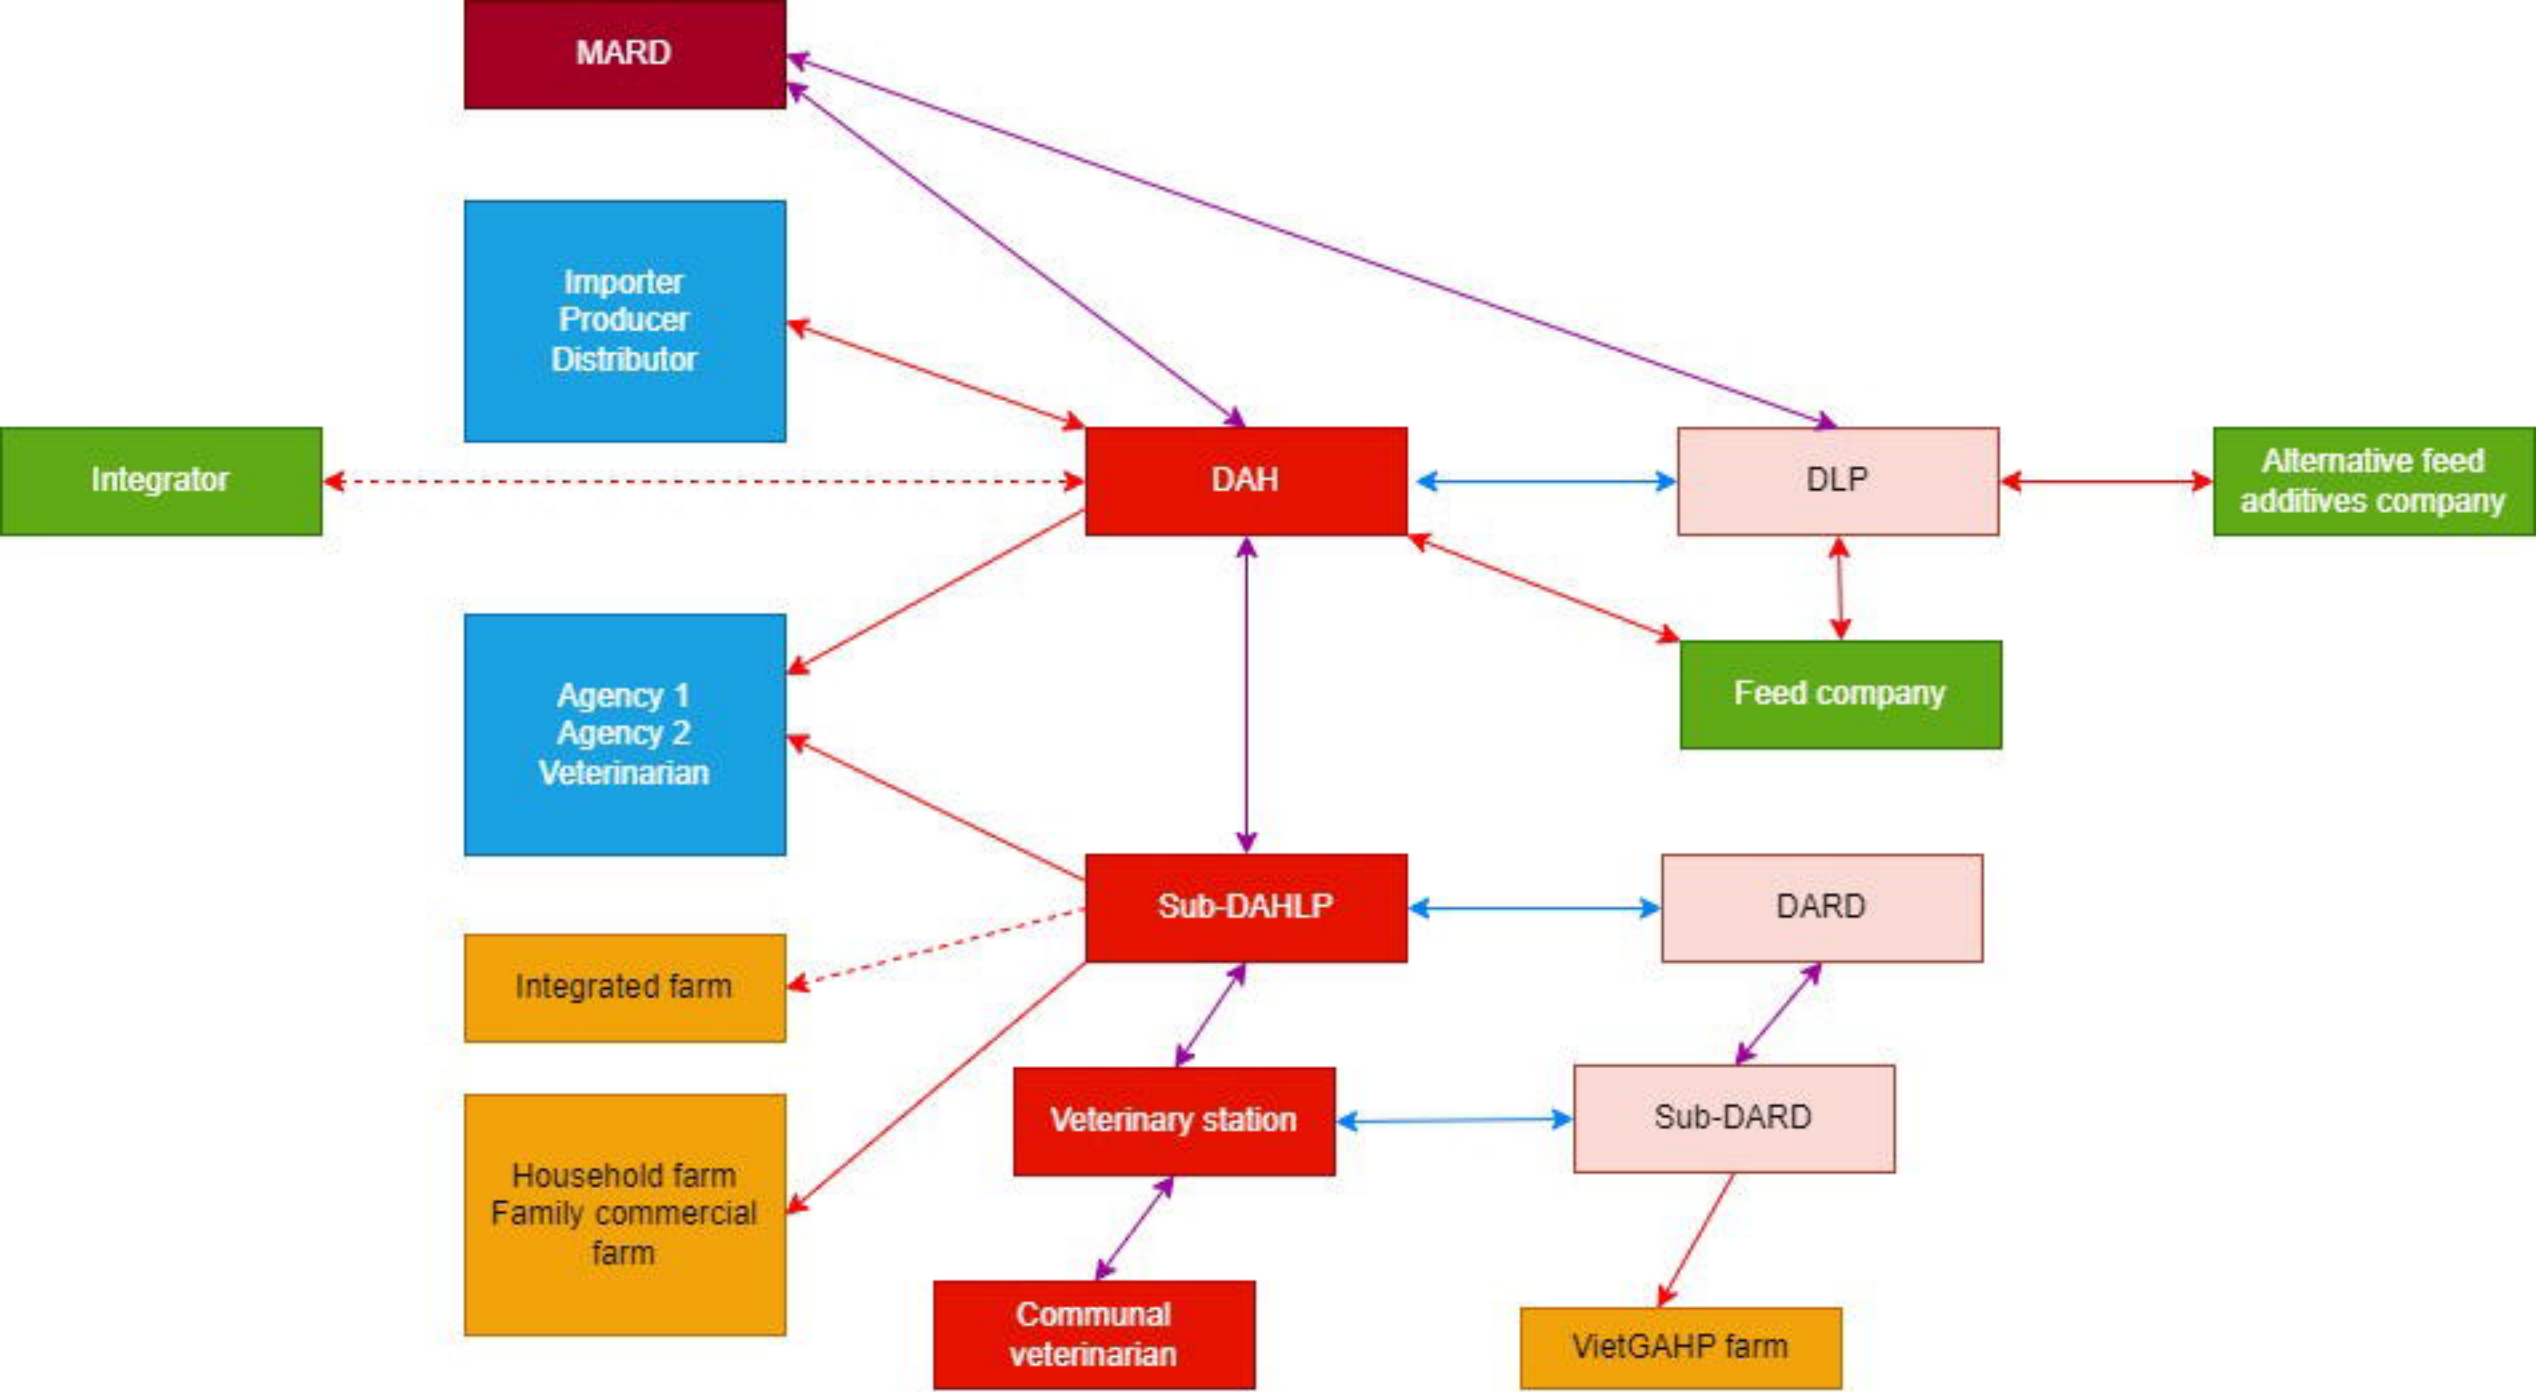

- ↔ Chain of command / recommendations
- ↔ Collaboration
- ↔ Control / recommendations
- Control
- - -> Weak or undetermined control

## PUBLIC SECTOR (n=9)

MARD = Ministry of Agriculture and Rural Development  
DAH = Department of Animal Health  
DLP = Department of Livestock production  
SubDAHLP = Subdepartment of Animal Health and Livestock  
Production  
DARD = Department of Agriculture and Rural Development  
Veterinarian district station  
Animal health worker  
NIVR = National Institute of Veterinary Research  
University

## INTERNATIONAL PARTNERS (n=6)

WHO = World Health Organization  
WOAH = World One Health Organization  
FAO = Food and Agriculture Organization

Foreign research development  
Donor

Foreign research center

## PRIVATE SECTOR (n=15)

### *Antibiotics and alternative feed additive suppliers*

Importer  
Producer  
Distributor  
Feed company  
Alternative feed additives  
company

Integrator  
Veterinarian integrated  
Agency 1  
Agency 2  
Veterinarian  
Human pharmacy

### *Users*

Integrated farm  
Family commercial farm  
Household farm

**PRIVATE SECTOR**

**PUBLIC SECTOR**

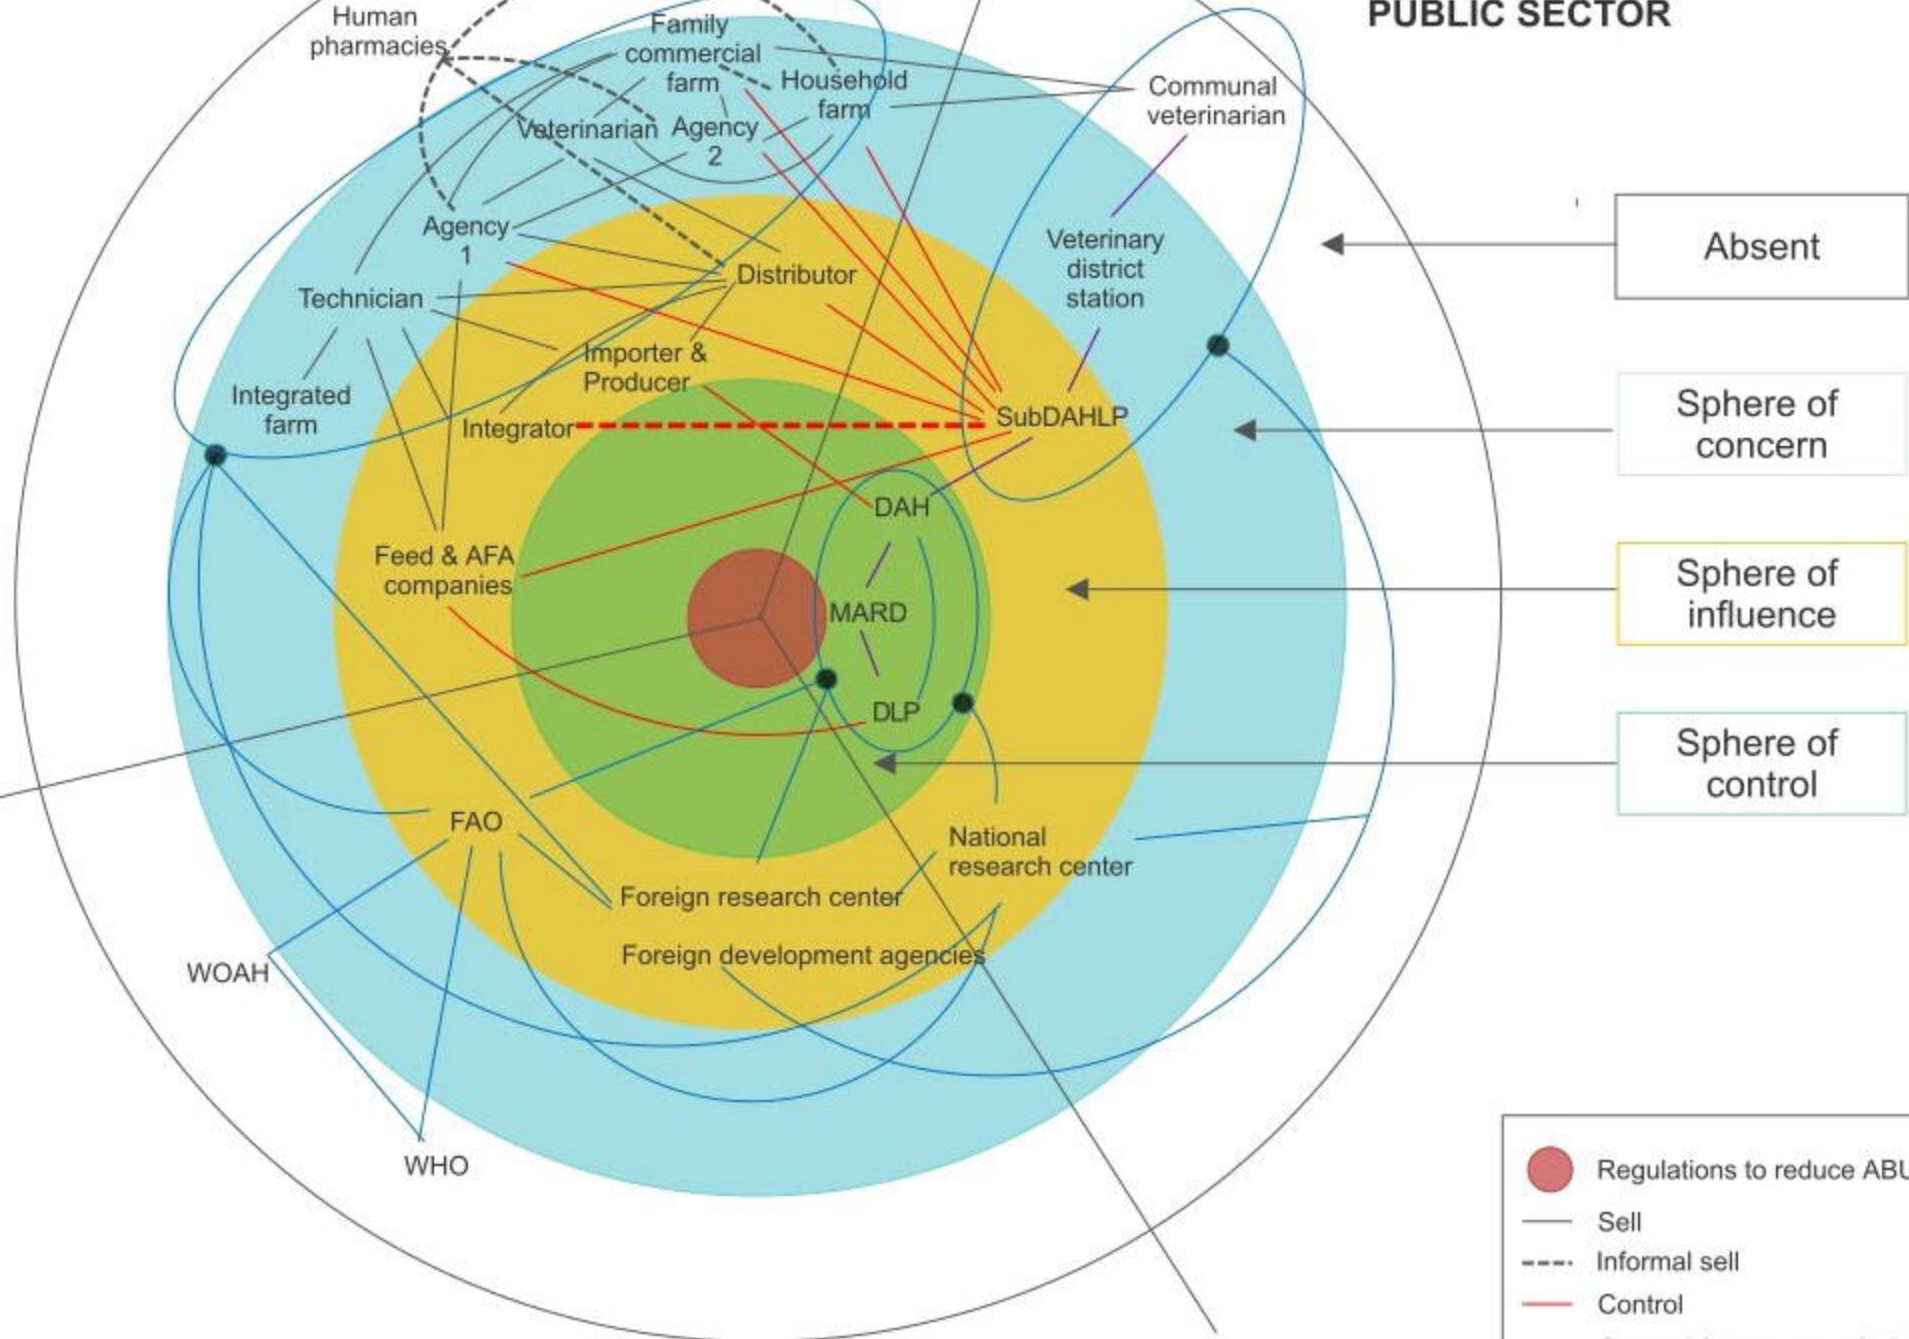

**INTERNATIONAL PARTNERS**

● Regulations to reduce ABU\*  
 — Sell  
 - - - Informal sell  
 — Control  
 — Control / recommendations  
 - - - Undetermined control  
 — Collaboration  
 — Chain of command / recommendations
