# Supplementary material for: Understanding the implementation of antimicrobial resistance policies in Vietnam: a multilayer analysis of the veterinary drug value chain
Source: bioRxiv or medRxiv preprint supplement (doi:10.1101/2024.06.27.24309573), 2025-01-06
Supplement: Supplementary file [file media-1.pdf]

Supplementary Material 1: Guide for focus group discussion of stakeholders of the veterinary drug value chain

**Guide – Focus group discussion**

| <b>Stakeholder mapping</b>                                                                                                                                                                                                                                                                                                                                                                                     |                                                                                                                                                                                                                                                                                                                                                                                                                                                                                                                                |
|----------------------------------------------------------------------------------------------------------------------------------------------------------------------------------------------------------------------------------------------------------------------------------------------------------------------------------------------------------------------------------------------------------------|--------------------------------------------------------------------------------------------------------------------------------------------------------------------------------------------------------------------------------------------------------------------------------------------------------------------------------------------------------------------------------------------------------------------------------------------------------------------------------------------------------------------------------|
| Veterinary drug value chain in poultry production in Vietnam                                                                                                                                                                                                                                                                                                                                                   |                                                                                                                                                                                                                                                                                                                                                                                                                                                                                                                                |
| <b>Objectives:</b>                                                                                                                                                                                                                                                                                                                                                                                             |                                                                                                                                                                                                                                                                                                                                                                                                                                                                                                                                |
| To draw the veterinary drug value chain with the identification of all stakeholders involved in it and to characterize interactions and roles of each stakeholder                                                                                                                                                                                                                                              |                                                                                                                                                                                                                                                                                                                                                                                                                                                                                                                                |
| <b>First step: identify all the stakeholders involved in the value chain</b>                                                                                                                                                                                                                                                                                                                                   |                                                                                                                                                                                                                                                                                                                                                                                                                                                                                                                                |
| Topics                                                                                                                                                                                                                                                                                                                                                                                                         | Information required                                                                                                                                                                                                                                                                                                                                                                                                                                                                                                           |
| <ul style="list-style-type: none"> <li>- To identify all the stakeholders involved in the veterinary drug supply chain</li> <li>➔ Post-it on the dashboard (different colors for private/public)</li> </ul> <p><i>Focus on Abs and then ask if the stakeholders are the same for the alternatives feed additives</i></p>                                                                                       | <ul style="list-style-type: none"> <li>- Please, try to identify all the stakeholders involved in the Veterinary drug supply chain</li> <li>- Public regulators (from central to local): MARD, DAH, DLP, ...</li> <li>- Research institution, university</li> <li>- International organizations (research institutions, projects, cooperation, ...)</li> <li>- Private sectors (importers, pharmaceutical industries, feed industries, animal drugs sellers, integrators, farmers, ...)</li> <li>- Informal sellers</li> </ul> |
| <ul style="list-style-type: none"> <li>- What are the roles of each stakeholder in the value chain?</li> <li>➔ Group all the stakeholders with the same roles on the dashboard</li> </ul>                                                                                                                                                                                                                      | <ul style="list-style-type: none"> <li>- Regulation</li> <li>- Production/Importation</li> <li>- Distribution</li> <li>- Prescription</li> <li>- Selling</li> <li>- Usage</li> <li>- Research/Project</li> </ul>                                                                                                                                                                                                                                                                                                               |
| <b>Second step: draw the veterinary drug value chain</b>                                                                                                                                                                                                                                                                                                                                                       |                                                                                                                                                                                                                                                                                                                                                                                                                                                                                                                                |
| Topics                                                                                                                                                                                                                                                                                                                                                                                                         | Information required                                                                                                                                                                                                                                                                                                                                                                                                                                                                                                           |
| <ul style="list-style-type: none"> <li>- To draw the ABs flow in poultry production (including medicated feed)</li> <li>➔ Draw the arrows of the flow of products</li> <li>- To complete the map flow with proportion (<i>if possible, depending on the respondent</i>)</li> <li>➔ Write the proportions on the arrows</li> </ul> <p><i>Draw the Abs flow and alternatives feed additives if different</i></p> | <ul style="list-style-type: none"> <li>- Where the farmers can buy ABs for their poultry?</li> <li>- Who are the sellers?</li> <li>- How is organized the production/distribution/wholesale for ABs?</li> <li>- Where do the ABs come from? <i>What is the proportion of imported products?</i></li> <li>- Are ABs sold abroad? <i>Where? What is the proportion?</i> Do you know of any illegal importation?</li> </ul> <p>Do you know of any informal source of AB (middlemen, reselling....)?</p>                           |

|                                                                                                                                                                                                                                                                                                                                                              |                                                                                                                                                                                                                                                                                                                                                            |
|--------------------------------------------------------------------------------------------------------------------------------------------------------------------------------------------------------------------------------------------------------------------------------------------------------------------------------------------------------------|------------------------------------------------------------------------------------------------------------------------------------------------------------------------------------------------------------------------------------------------------------------------------------------------------------------------------------------------------------|
| <ul style="list-style-type: none"> <li>- Identify the chain of advice</li> <li>➔ Draw the arrow of the chain of advice</li> <li>➔ The formality of the interaction: formal (ex with a contract), informal, both</li> <li>➔ Strength of interactions</li> </ul>                                                                                               | <ul style="list-style-type: none"> <li>- What are the different users (different kinds of farmers can buy drugs from different sources)?</li> <li>- When selling ABs, do they give advice?</li> <li>-</li> </ul>                                                                                                                                           |
| <ul style="list-style-type: none"> <li>- Identify the interactions between stakeholders</li> <li>➔ Directions of interactions from one to another one, in both directions, network (include more than 2 stakeholders)</li> <li>➔ The formality of the interaction: formal (ex with a contract), informal, both</li> <li>➔ Strength of interaction</li> </ul> | <ul style="list-style-type: none"> <li>- What are the interactions or influences between the different stakeholders?</li> <li>- Who works with whom?</li> <li>- Who interacts with whom?</li> <li>- What is the nature of the interactions?</li> <li>- What is the link between the public and the private sector? (public-private partnership)</li> </ul> |
| <b>Third step: Identify the legislation</b>                                                                                                                                                                                                                                                                                                                  |                                                                                                                                                                                                                                                                                                                                                            |
| <ul style="list-style-type: none"> <li>- Identify the existing legislation</li> </ul>                                                                                                                                                                                                                                                                        | <ul style="list-style-type: none"> <li>- What are the main legislations related to ABs that you are aware of related to Abs manufacture/sell/use?</li> <li>- Are they applied?</li> </ul>                                                                                                                                                                  |
| <ul style="list-style-type: none"> <li>- Identify the position regarding new regulations (if time)</li> </ul> <p><i>Ban of AB in the feed for prevention</i><br/><i>Mandatory prescription</i></p>                                                                                                                                                           | <ul style="list-style-type: none"> <li>- Are you aware of what is going to change in terms of regulations related to ABs?</li> <li>- With this new regulation what is going to change in the interaction between the stakeholders? At which level?</li> </ul>                                                                                              |
