# Supplementary material for: Understanding the implementation of antimicrobial resistance policies in Vietnam: a multilayer analysis of the veterinary drug value chain
Source: bioRxiv or medRxiv preprint supplement (doi:10.1101/2024.06.27.24309573), 2025-01-06
Supplement: Supplementary file [file media-2.pdf]

Supplementary Material 2: Guide for semi-structured interviews of stakeholders of the veterinary drug value chain

| Questions                                                                                                                                                                                                                                                                                                                                                                                                                                 | Action                                                                                                                                                                                       |
|-------------------------------------------------------------------------------------------------------------------------------------------------------------------------------------------------------------------------------------------------------------------------------------------------------------------------------------------------------------------------------------------------------------------------------------------|----------------------------------------------------------------------------------------------------------------------------------------------------------------------------------------------|
| <b>Structural position and role in the value chain</b>                                                                                                                                                                                                                                                                                                                                                                                    |                                                                                                                                                                                              |
| <p>Here is the value chain that has been drawn in a previous workshop.<br/>Where do you stand on this value chain?</p>                                                                                                                                                                                                                                                                                                                    | <p>Presentation of the value chain on PADLET<br/>Add on the diagram where is the stakeholders (5 stars on PADLET)</p>                                                                        |
| <p>Could you please describe your activities?<br/>For which company/institution are you working?</p> <p>Could you please describe the activities of your company/institution?<br/>Functions and missions of your institutions/companies in the command chain?</p> <p>(How many people are in your company? When the company was established? What are the main products/services of your company? The volumes of products/services? )</p> | <p>Complete the flow of antibiotic and/or alternative feed additives value chain</p> <p>Role of the SH, of the company</p>                                                                   |
| <b>Interactions with other stakeholders</b>                                                                                                                                                                                                                                                                                                                                                                                               |                                                                                                                                                                                              |
| <p>With whom are you working in your daily activities?<br/>To whom do you sell your drugs? To whom do you buy the materials? Who are your clients? (think about exportation)</p> <p>Who else do you interact with?<br/>Could you please describe the nature of the interaction for each stakeholder?</p> <p>Do your colleagues work/interact with other people?</p>                                                                       | <p>Add to the diagram the additional stakeholders<br/>Discuss for each interaction: the nature, direction, ... by showing it on the diagram</p> <p>Ranking on PADLET</p> <p>Interactions</p> |
| <p>Are you a part of a professional organization for feed/drug companies/farm cooperatives?</p> <p>Do you collaborate with the public sector or any international organization?<br/>Do you collaborate with the private sector? (ie consultant for policy)</p> <p>Which kind of collaborations?</p>                                                                                                                                       | <p>Add on the diagram the collaborations</p>                                                                                                                                                 |
| <p>Do you trade/use/make policy on alternative medicines?<br/>What is your opinion on these medicines?<br/>Who are the main users?</p>                                                                                                                                                                                                                                                                                                    | <p>Alternative feed additives</p>                                                                                                                                                            |
| <p>Who (authority) is performing the control? Do you have internal regulations decided by the company?</p>                                                                                                                                                                                                                                                                                                                                | <p>Add in the diagram the person in charge of the controls</p> <p>Regulations</p>                                                                                                            |

|                                                                                                                                                                                                                                                             |                                          |
|-------------------------------------------------------------------------------------------------------------------------------------------------------------------------------------------------------------------------------------------------------------|------------------------------------------|
| What kind of control is it? What is the frequency?                                                                                                                                                                                                          | Interactions                             |
| <b>Knowledge and opinion on ABR and NAP</b>                                                                                                                                                                                                                 |                                          |
| What is your opinion on ABR in Vietnam?<br>Do you know any strategies to fight ABR in Vietnam?                                                                                                                                                              | Opinion/Knowledge on ABR                 |
| <i>Since 2017, the Vietnamese government has implemented a strategy to fight against ABR in livestock production</i>                                                                                                                                        |                                          |
| Have you heard about it? If yes, from where?<br>What do you think about it?                                                                                                                                                                                 | Opinion/Knowledge on NAP                 |
| <b>Barriers / motivations new regulations</b>                                                                                                                                                                                                               |                                          |
| <i>Two new regulations have been issued: - ban on AB in feed for prophylaxis<br/>- mandatory prescription to buy drugs</i>                                                                                                                                  |                                          |
| Were you aware of these two new regulations?<br>How do you know about the change in regulations?                                                                                                                                                            | Regulations<br>Knowledge on regulations  |
| What do you think about those regulations?<br>Do you think that these changes is a good thing or a bad thing? For yourself and for the other stakeholders?                                                                                                  | Interest                                 |
| How do you think that these regulations are going to be applied? Why?                                                                                                                                                                                       | Willingness to implement the legislation |
| What are the positive and negative consequences?                                                                                                                                                                                                            |                                          |
| What do you think is going to change in the value chain?<br>What is going to change with these regulations in your daily activities? What will be the impact on your daily activities?<br>To compensate for these changes, what are you going to establish? | Change in the chain                      |
