# Supplementary material for: Understanding the implementation of antimicrobial resistance policies in Vietnam: a multilayer analysis of the veterinary drug value chain
Source: medRxiv preprint, doi:10.1101/2024.06.27.24309573, version 3 (2025-01-06)
Supplement: Supplementary Material 4 [file 309573_file09.pdf]

Supplementary Material 4: **Factors influencing the implementation of the new regulations to reduce antibiotic use in chicken production in Vietnam from respondent's perspectives from semi-structured interviews (n=39) 2021, Vietnam.** MARD: Ministry of Agriculture and Rural Development; DAH: Department of Animal Health; DLP: Department of Livestock Production; SubDAHLP: Subdepartment of Animal Health and Livestock Production; DARD: Department of Agriculture and Rural Development;

[illegible]
